# Supplementary material for: Role of sulfur vacancies in MoS2 monolayers in stabilizing Co atoms for efficient CO oxidation
Source: Royal Society of Chemistry journal article supplement (doi:10.1039/d2ra06261e), 2022-01-01
Supplement: d2ra06261e1.pdf [file d2ra06261e1.pdf]

### Electronic supplementary information

## Role of Sulfur Vacancies in MoS<sub>2</sub> Monolayers in Stabilizing Co Atoms for Efficient CO Oxidation

Manman Li,<sup>†</sup> Tianchun Li,<sup>†</sup> Yu Jing<sup>†,\*</sup>

<sup>†</sup>Jiangsu Co-Innovation Centre of Efficient Processing and Utilization of Forest Resources, College of Chemical Engineering, Nanjing Forestry University, Nanjing 210037, China

To whom correspondence should be addressed. Email: [yujing@njfu.edu.cn](mailto:yujing@njfu.edu.cn)(YJ)

**Table S1** Comparison of the binding energy ( $E_b$ , eV) of Co atom and adsorption energies ( $E_{ads}$ , eV) of CO and O<sub>2</sub> on Co-SMoS<sub>2</sub> calculated with the 2 × 2, 3 × 3, 4 × 4 and 5 × 5 supercells. All the adsorption energies are for the most favored adsorption configurations. The negative values represent the exothermic adsorption.

| Supercell             | 2×2   | 3×3   | 4×4   | 5×5   |
|-----------------------|-------|-------|-------|-------|
| $E_b(\text{Co})$      | -4.45 | -4.39 | -4.39 | -4.38 |
| $E_{ads}(\text{CO})$  | -1.78 | -1.77 | -1.78 | -1.78 |
| $E_{ads}(\text{O}_2)$ | -1.69 | -1.64 | -1.64 | -1.64 |

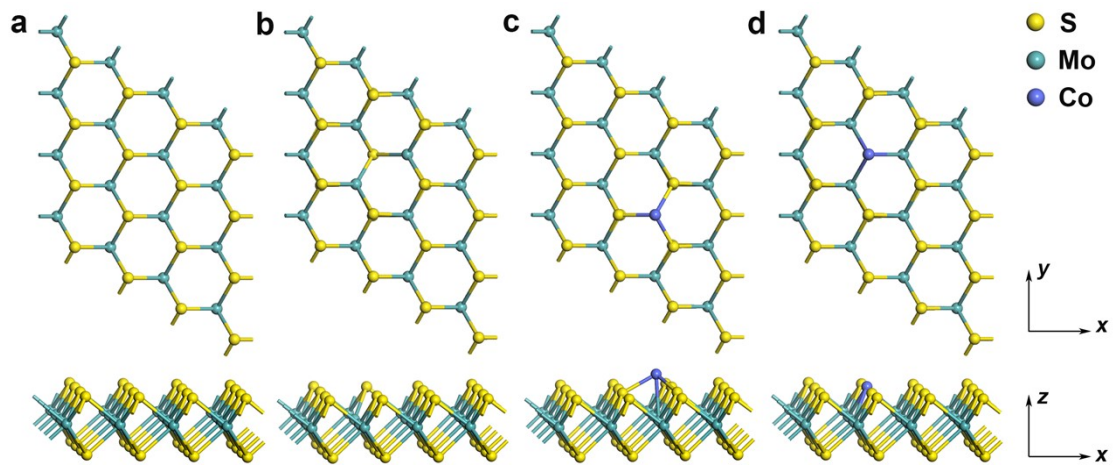

**Fig. S1** Top (upper) and side (lower) view of the optimized most energetically favorable configurations of (a) defect-free MoS<sub>2</sub>, (b) MoS<sub>2</sub>-Sv, (c) Co/MoS<sub>2</sub> and (d) Co<sup>S</sup>MoS<sub>2</sub>, respectively.

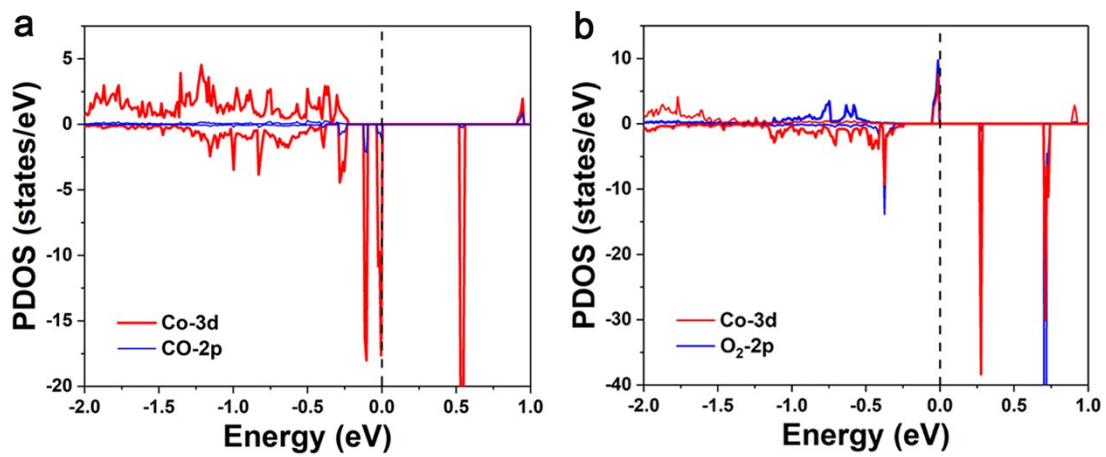

**Fig. S2** The PDOS of adsorbed (a) CO and (b) O<sub>2</sub> on the Co<sup>S</sup>MoS<sub>2</sub>. The Fermi level is set to zero.

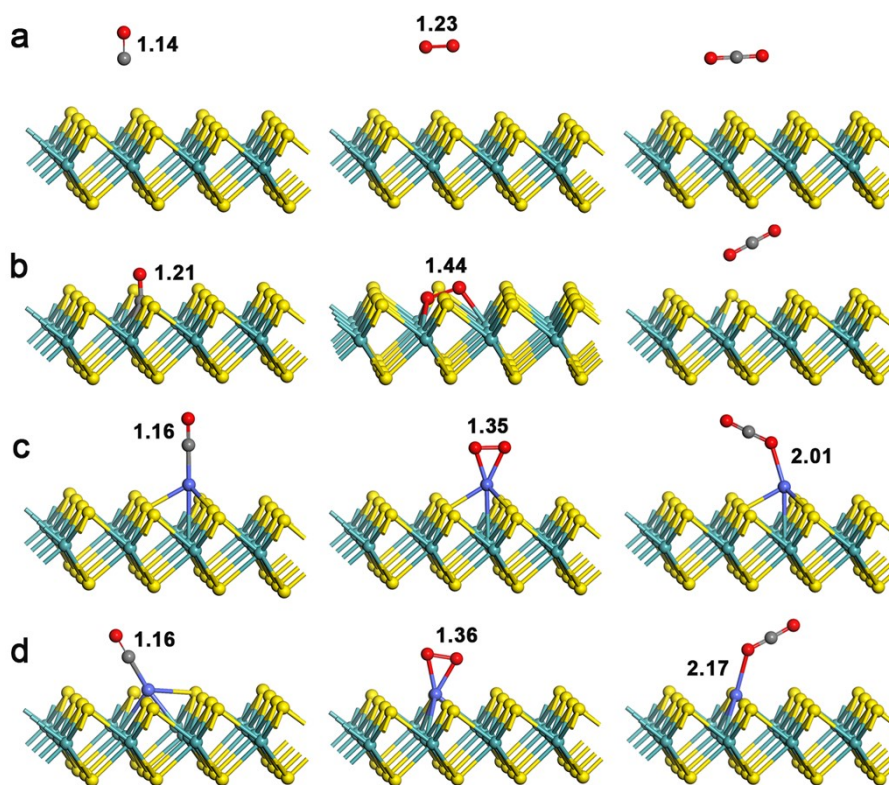

**Fig. S3** The optimized structure for CO, O<sub>2</sub> and CO<sub>2</sub> adsorbed on (a) defect-free MoS<sub>2</sub>, (b) MoS<sub>2</sub>-Sv, (c) Co/MoS<sub>2</sub> and (d) Co<sup>S</sup>MoS<sub>2</sub>. The green, yellow, blue, gray and red spheres represent Mo, S, Co, C and O elements, respectively.

**Table S2** Comparison of the binding energy ( $E_b$ , eV) of Co atom, bond lengths ( $d$ , Å) and adsorption energies ( $E_{\text{ads}}$ , eV) of CO, O<sub>2</sub>, CO<sub>2</sub>, CO+O<sub>2</sub> and 2CO on defect-free MoS<sub>2</sub>, MoS<sub>2</sub>-Sv, Co/MoS<sub>2</sub> and Co<sup>S</sup>MoS<sub>2</sub>. All the adsorption energies are for the most favored adsorption configurations. The negative values represent the exothermic adsorption.

|                               | defect-free MoS <sub>2</sub> | MoS <sub>2</sub> -Sv | Co/MoS <sub>2</sub> | Co <sup>S</sup> MoS <sub>2</sub> |
|-------------------------------|------------------------------|----------------------|---------------------|----------------------------------|
| $E_b(\text{Co})$              | -                            | -                    | -3.28               | -4.39                            |
| $E_{\text{ads}}(\text{CO})$   | -0.15                        | -1.24                | -2.30               | -1.78                            |
| $d(\text{C-O})$               | 1.14                         | 1.21                 | 1.16                | 1.16                             |
| $E_{\text{ads}}(\text{O}_2)$  | -0.09                        | -2.14                | -1.90               | -1.64                            |
| $d(\text{O-O})$               | 1.23                         | 1.44                 | 1.35                | 1.36                             |
| $E_{\text{ads}}(\text{CO}_2)$ | -0.19                        | -0.23                | -0.48               | -0.48                            |

|                                        |       |           |       |       |
|----------------------------------------|-------|-----------|-------|-------|
| d(Co-C)                                | -     | -         | 2.01  | 2.17  |
| $E_{\text{ads}}(\text{CO}+\text{O}_2)$ | -0.28 | -2.33     | -2.67 | -2.04 |
| d(C-O)                                 | 1.14  | 1.14      | 1.16  | 1.16  |
| d(O-O)                                 | 1.23  | 1.44      | 1.29  | 1.29  |
| $E_{\text{ads}}(2\text{CO})$           | -0.33 | -1.32     | -3.29 | -2.81 |
| d(C-O)                                 | 1.14  | 1.23/1.14 | 1.16  | 1.16  |

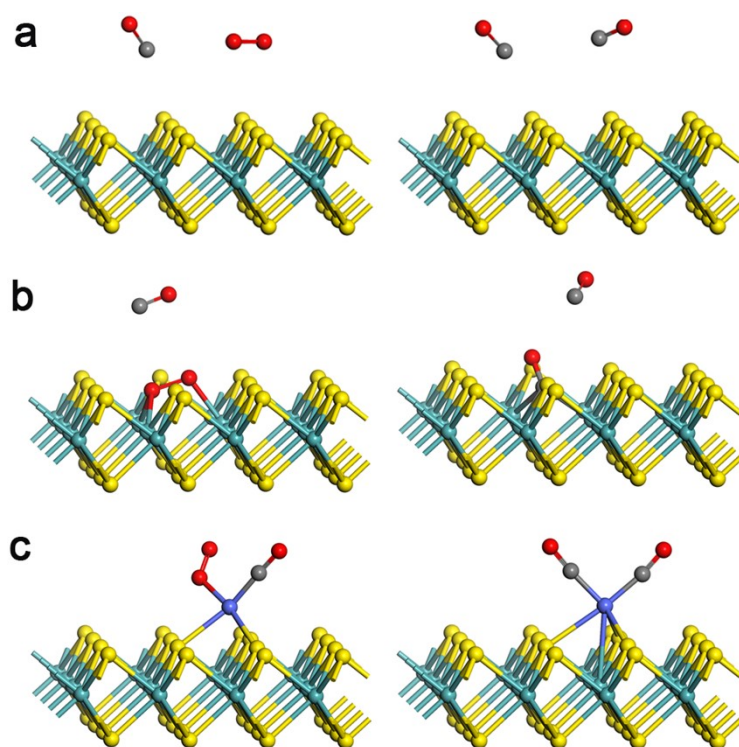

**Fig. S4** The optimized structure for  $\text{CO}+\text{O}_2$  and  $2\text{CO}$  adsorbed on (a) defect-free  $\text{MoS}_2$ , (b)  $\text{MoS}_2\text{-Sv}$  and (c)  $\text{Co}/\text{MoS}_2$ .

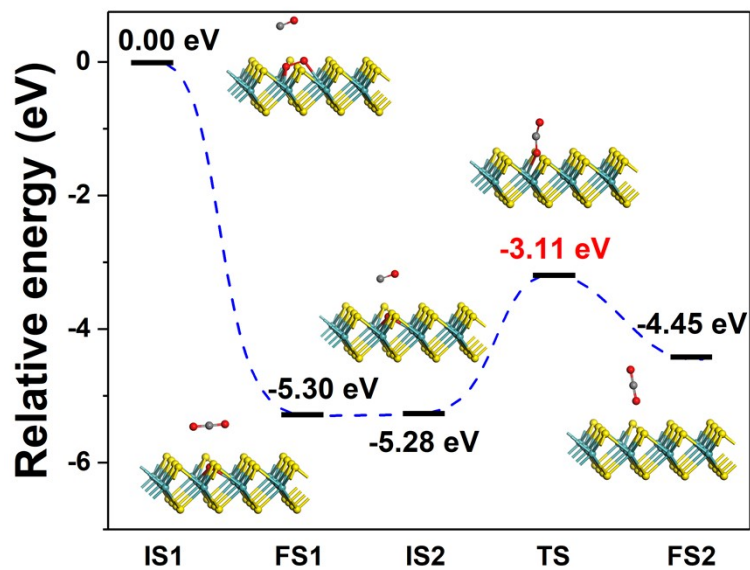

**Fig. S5** The potential energy diagram for reaction process of O<sub>2</sub> adsorbed on MoS<sub>2</sub>-Sv with CO molecules.

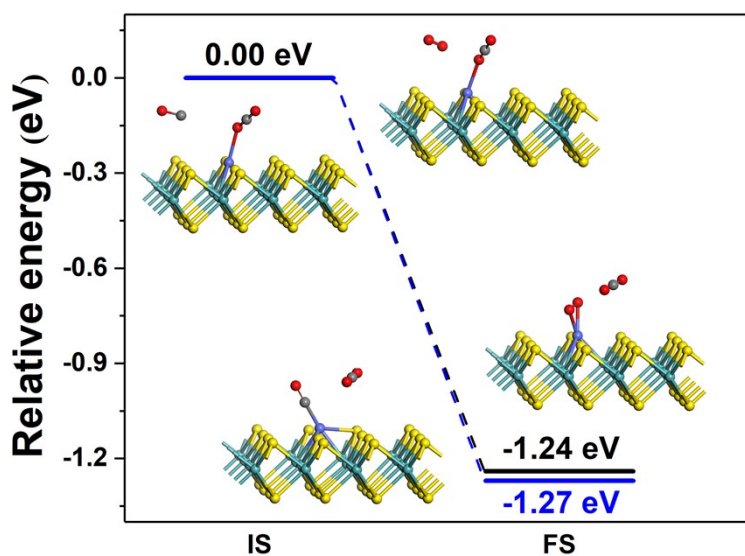

**Fig. S6** Reaction pathway for the substitute adsorption of O<sub>2</sub> (black line) and CO (blue line) with CO<sub>2</sub> produced by the reaction on Co-SMoS<sub>2</sub>.

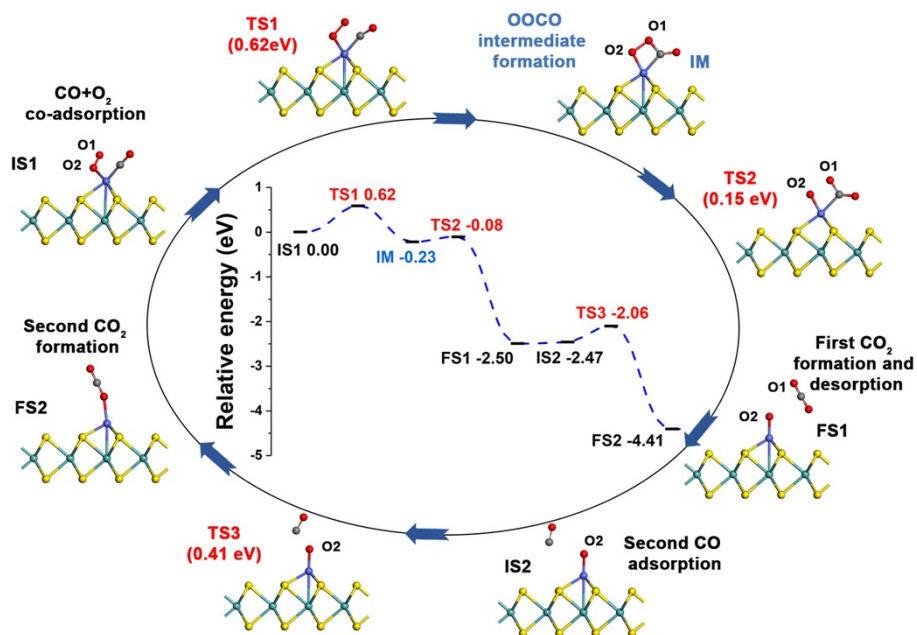

**Fig. S7** Reaction pathway for CO oxidation on Co/MoS<sub>2</sub> based on the LH mechanism.

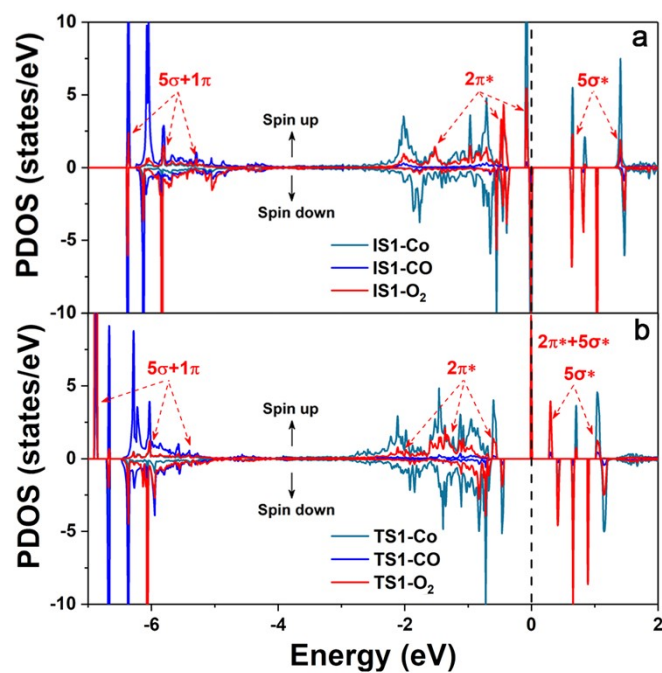

**Fig. S8** The PDOS projected onto Co (green curve), adsorbed O<sub>2</sub> (red curve), and CO (blue curve) in the (a) IS1 and (b) TS1 in the reaction pathway via LH mechanism on Co-<sup>S</sup>MoS<sub>2</sub>.

Atomic coordinates of the optimized pristine MoS<sub>2</sub>, MoS<sub>2</sub>-Sv, Co/MoS<sub>2</sub> and Co-<sup>S</sup>MoS<sub>2</sub> monolayers, and Co-<sup>S</sup>MoS<sub>2</sub> adsorbed with CO, O<sub>2</sub> and different intermediates of CO oxidation along the ER, NER, LH and TER mechanisms are as follows.

**Defect-free MoS<sub>2</sub> monolayer**

| <b>X</b>           | <b>Y</b>           | <b>Z</b>           |
|--------------------|--------------------|--------------------|
| 0.0824706664551820 | 0.1659586506714432 | 0.5000048598045711 |
| 0.3324706668709111 | 0.1659587361297206 | 0.5000048655280402 |
| 0.5824706467545375 | 0.1659587085179870 | 0.5000048586266799 |
| 0.8324707203214565 | 0.1659586989461552 | 0.5000048718829735 |
| 0.0824707054674611 | 0.4159587741331430 | 0.5000048602686352 |
| 0.3324707417564429 | 0.4159587611719753 | 0.5000048567336625 |
| 0.5824706732122382 | 0.4159587463967336 | 0.5000048648191466 |
| 0.8324706966448794 | 0.4159587166985819 | 0.5000048598503632 |
| 0.0824707414309221 | 0.6659587661326638 | 0.5000048598104926 |
| 0.3324706574040456 | 0.6659587196545742 | 0.5000048653218663 |
| 0.5824706515884308 | 0.6659586652872341 | 0.5000048646149923 |
| 0.8324706390615951 | 0.6659587255327922 | 0.5000048704128671 |
| 0.0824706941335551 | 0.9159587236051027 | 0.5000048618406129 |
| 0.3324706311358859 | 0.9159586852366731 | 0.5000048659614122 |
| 0.5824706359661209 | 0.9159586867586985 | 0.5000048645405335 |
| 0.8324707082808234 | 0.9159587389323103 | 0.5000048614230591 |
| 0.1657891703725962 | 0.0826317692319448 | 0.5781516099240381 |
| 0.1657802979788535 | 0.0826296288348445 | 0.4218535204584600 |
| 0.4157891135403129 | 0.0826317448554022 | 0.5781516010002891 |
| 0.4157802161741417 | 0.0826296079009773 | 0.4218535190500215 |
| 0.6657890692409006 | 0.0826317066164206 | 0.5781516408317592 |
| 0.6657801800295631 | 0.0826295443924608 | 0.4218534709217859 |
| 0.9157891210696295 | 0.0826317342184250 | 0.5781516631517734 |
| 0.9157802403343173 | 0.0826295888198841 | 0.4218534572920501 |
| 0.1657891395499890 | 0.3326317405892357 | 0.5781516139836066 |
| 0.1657802725528759 | 0.3326296208519384 | 0.4218535237547689 |
| 0.4157891134777165 | 0.3326316959832785 | 0.5781515386877843 |
| 0.4157802132078504 | 0.3326295587704575 | 0.4218535840996247 |
| 0.6657890352880389 | 0.3326317311612691 | 0.5781515897585264 |
| 0.6657801795729001 | 0.3326296092369077 | 0.4218535366385965 |
| 0.9157891389999326 | 0.3326317300616873 | 0.5781516421676250 |
| 0.9157802565130305 | 0.3326296106945530 | 0.4218534685870620 |
| 0.1657891323476857 | 0.5826317114558971 | 0.5781516178096253 |
| 0.1657802526520736 | 0.5826295758788171 | 0.4218534944658164 |
| 0.4157890418252665 | 0.5826316944795046 | 0.5781515688814846 |
| 0.4157801973499077 | 0.5826295666945297 | 0.4218535498389593 |
| 0.6657891146696292 | 0.5826317110799457 | 0.5781515481346612 |
| 0.6657802439850630 | 0.5826295694340319 | 0.4218535658480771 |
| 0.9157891041212357 | 0.5826317877915279 | 0.5781516127893569 |
| 0.9157802371258429 | 0.5826296254522102 | 0.4218535059734612 |
| 0.1657890898462770 | 0.8326316804349382 | 0.5781516491444136 |
| 0.1657802174001090 | 0.8326295699079015 | 0.4218534769987835 |

|                    |                    |                    |
|--------------------|--------------------|--------------------|
| 0.4157890840774075 | 0.8326316994118319 | 0.5781516324659681 |
| 0.4157802127166533 | 0.8326295551525340 | 0.4218534848458334 |
| 0.6657890982778887 | 0.8326316908586420 | 0.5781516760133042 |
| 0.6657802015815665 | 0.8326295480719443 | 0.4218534530369815 |
| 0.9157891124546282 | 0.8326316523441265 | 0.5781516296511295 |
| 0.9157801891816569 | 0.8326294875260933 | 0.4218534863544934 |

### MoS<sub>2</sub>-Sv monolayer

| X                  | Y                  | Z                  |
|--------------------|--------------------|--------------------|
| 0.0833404601581850 | 0.1668372016060566 | 0.5010056676482100 |
| 0.3325263923150306 | 0.1668922275460864 | 0.5009981769163313 |
| 0.5819959030607370 | 0.1657382307703207 | 0.5004075557340865 |
| 0.8327388597481540 | 0.1656855812245228 | 0.5004033067672057 |
| 0.0853500928022082 | 0.4174226764291998 | 0.4990722956897291 |
| 0.3348384931253244 | 0.4207711166741488 | 0.4972958653248278 |
| 0.5809650252072935 | 0.4174353472901322 | 0.4991002920150345 |
| 0.8327076633241336 | 0.4165009787165797 | 0.5004384145937856 |
| 0.0833474444169992 | 0.6659585225537129 | 0.5010437245266371 |
| 0.3348095297829379 | 0.6635491126170737 | 0.4973299477408135 |
| 0.5776324132199592 | 0.6635274819501534 | 0.4973473500953948 |
| 0.8315531225573369 | 0.6659260335366419 | 0.5010754673165109 |
| 0.0824656413894951 | 0.9159783994458689 | 0.5017399834007726 |
| 0.3324888004730469 | 0.9150975663403234 | 0.5009971591478402 |
| 0.5809398863540319 | 0.9130129305487146 | 0.4990882722267486 |
| 0.8315611727430386 | 0.9150756183208583 | 0.5010522574841781 |
| 0.1664169774136342 | 0.0837111410729557 | 0.5795351617439596 |
| 0.1656421899321892 | 0.0822719506020035 | 0.4234097584266980 |
| 0.4162496715369445 | 0.0828333172712284 | 0.5790004753863172 |
| 0.4147818357949056 | 0.0821101891886936 | 0.4229040668919347 |
| 0.6647675871279419 | 0.0804664222905639 | 0.5777112867045566 |
| 0.6656952731994673 | 0.0824090377365587 | 0.4221997988959779 |
| 0.9156618061748116 | 0.0829122752685385 | 0.5790731553089444 |
| 0.9163328532593711 | 0.0819887908984486 | 0.4229325210107922 |
| 0.1721512172593088 | 0.3393379081683775 | 0.5772841025153319 |
| 0.1672728182798360 | 0.3320058880135526 | 0.4210117281613778 |
| 0.4161385567551550 | 0.3393700668435219 | 0.5773034007579835 |
| 0.4136447442222241 | 0.3320472785398818 | 0.4210011130796739 |
| 0.6647233264327362 | 0.3337196080914350 | 0.5777382764482629 |
| 0.6656765116892512 | 0.3327821124537076 | 0.4222370140356879 |
| 0.9179189869139377 | 0.3336860566696684 | 0.5777258022229507 |
| 0.9159185248830974 | 0.3327173244084609 | 0.4222162020956723 |
| 0.1721509874230197 | 0.5821858071177655 | 0.5773362753500574 |
| 0.1673067709747556 | 0.5848229433268490 | 0.4210237420254613 |
| 0.4158417691268382 | 0.5826995281376324 | 0.4186845334993936 |



|                    |                    |                    |
|--------------------|--------------------|--------------------|
| 0.6590308757501037 | 0.5822224455645186 | 0.5773354954871680 |
| 0.6664072603159243 | 0.5848042010967032 | 0.4210360697622107 |
| 0.9156646908444195 | 0.5822445807998217 | 0.5790879812395117 |
| 0.9163231343377484 | 0.5837086842365606 | 0.4229773368255108 |
| 0.1663422808021894 | 0.8321616752386372 | 0.5795457567368671 |
| 0.1655781955073740 | 0.8328079589953862 | 0.4234159117576610 |
| 0.4160826189110659 | 0.8262625182393450 | 0.5773235565201941 |
| 0.4136137670953586 | 0.8310425062874570 | 0.4210231045244481 |
| 0.6589980406854495 | 0.8262754409819265 | 0.5773073976001891 |
| 0.6663493323390457 | 0.8310092196891760 | 0.4210514786994780 |
| 0.9148294419400630 | 0.8321516255561870 | 0.5795618912362166 |
| 0.9160772923939118 | 0.8327123926441033 | 0.4234594144213656 |

### Co/MoS<sub>2</sub> monolayer

| X                  | Y                  | Z                  |
|--------------------|--------------------|--------------------|
| 0.0826499620004977 | 0.1660773500147732 | 0.4997320779399325 |
| 0.3324719020844399 | 0.1648843777121916 | 0.5000250451005260 |
| 0.5813633284129580 | 0.1648323113053403 | 0.5000142278013039 |
| 0.8323971446469708 | 0.1660581647644120 | 0.4997281182417543 |
| 0.0824397201120018 | 0.4159220259708241 | 0.4995756100165649 |
| 0.3325286872991700 | 0.4170930589353963 | 0.5000121023169735 |
| 0.5824254183369728 | 0.4158898988001339 | 0.4997219167155394 |
| 0.8335711969643647 | 0.4170767633167377 | 0.4999953300557439 |
| 0.0825962409684177 | 0.6660597210609371 | 0.4999740246248787 |
| 0.3324327787174345 | 0.6660317889102670 | 0.4999677491652496 |
| 0.5814306808491371 | 0.6659574590206031 | 0.4999625601827716 |
| 0.8335497711354256 | 0.6659348213166847 | 0.4999852354316158 |
| 0.0824365414243984 | 0.9160008061678605 | 0.4996024023264611 |
| 0.3323781572270960 | 0.9158437462175989 | 0.5000029154469835 |
| 0.5825254379973459 | 0.9159684678392738 | 0.4995660879270590 |
| 0.8324199535848049 | 0.9158472776124148 | 0.4996982721375046 |
| 0.1652095011497907 | 0.0819914547242295 | 0.5778637732232202 |
| 0.1660880000296348 | 0.0828685857727216 | 0.4215272379021202 |
| 0.4155749028756064 | 0.0821622656798927 | 0.5784118927096613 |
| 0.4156984244362421 | 0.0824253707679119 | 0.4216846642076978 |
| 0.6656986572117577 | 0.0818965666333888 | 0.5778530450380981 |
| 0.6658188714503140 | 0.0828828025026598 | 0.4215128606955323 |
| 0.9157517097868004 | 0.0826035455510551 | 0.5777746458212274 |
| 0.9159219612714571 | 0.0827394025298701 | 0.4215896341177709 |
| 0.1652050131552656 | 0.3327166009614291 | 0.5778372554436205 |
| 0.1661420770358697 | 0.3327205112054422 | 0.4215136847289531 |
| 0.4093351205258640 | 0.3294038650055428 | 0.5816364284277213 |
| 0.4167452908845564 | 0.3330751879372900 | 0.4225839763548760 |
| 0.6690066394463903 | 0.3293803135631548 | 0.5815933658168567 |

|                    |                    |                    |
|--------------------|--------------------|--------------------|
| 0.6653000959370881 | 0.3330423972932857 | 0.4225871941127550 |
| 0.9164089027195870 | 0.3326672183351739 | 0.5778558683290873 |
| 0.9155944206439353 | 0.3327045398929819 | 0.4215066832730185 |
| 0.1657027288516017 | 0.5824592923286155 | 0.5779271930106276 |
| 0.1659512716201018 | 0.5829101820441882 | 0.4216178607187819 |
| 0.4156798455448730 | 0.5829500877977696 | 0.5783874004067953 |
| 0.4157814196907174 | 0.5828246196957267 | 0.4216439125262704 |
| 0.6690376981284930 | 0.5890713470113438 | 0.5815647727651451 |
| 0.6652897405782709 | 0.5815429982807603 | 0.4225603345419845 |
| 0.9162950857801859 | 0.5828781949295948 | 0.5784068561038355 |
| 0.9160543944383920 | 0.5827795467426439 | 0.4216453709308460 |
| 0.1656709082433595 | 0.8326781433073833 | 0.5779645952616282 |
| 0.1659495628111045 | 0.8326423262902268 | 0.4216263178045852 |
| 0.4159539786495867 | 0.8326854904243203 | 0.5779492635398540 |
| 0.4156023644328617 | 0.8325792633914705 | 0.4216354422839631 |
| 0.6657351845384202 | 0.8332055998401372 | 0.5778308954805617 |
| 0.6658457221063457 | 0.8324458487022875 | 0.4214746337915374 |
| 0.9163856951299758 | 0.8332068161359861 | 0.5778238281688387 |
| 0.9156652420771241 | 0.8324328383904829 | 0.4215030751741353 |
| 0.5822828950569808 | 0.4158886503656463 | 0.6272018668574901 |

**Co-<sup>S</sup>MoS<sub>2</sub> monolayer**

| <b>X</b>           | <b>Y</b>           | <b>Z</b>            |
|--------------------|--------------------|---------------------|
| 0.0829574029213410 | 0.1666201113735442 | 0.5009064806302035  |
| 0.3327274737277075 | 0.1666659212858356 | 0.5007729535585842  |
| 0.5822899400900154 | 0.1659080478467558 | 0.5004721186209369  |
| 0.8327429810116384 | 0.1658646872642567 | 0.50064444610525986 |
| 0.0846307800995843 | 0.4170747968471472 | 0.4995122187526150  |
| 0.3334774200170156 | 0.4162949716107133 | 0.4966799056926022  |
| 0.5815894896860759 | 0.4162952134740228 | 0.4992141122189696  |
| 0.8327292745425163 | 0.4163230901398581 | 0.5006677254167791  |
| 0.0828736491237995 | 0.6657905903229695 | 0.5008697719757090  |
| 0.3333951136797531 | 0.6667874271334056 | 0.4966296676959278  |
| 0.5803182287974782 | 0.6649793409838828 | 0.4969757617616936  |
| 0.8313855869713249 | 0.6655262834996647 | 0.5009870353025072  |
| 0.0822332428841480 | 0.9158758702976104 | 0.5015799292031466  |
| 0.3326720103357040 | 0.9155596467654052 | 0.5007159882796386  |
| 0.5815841953451639 | 0.9148518283577839 | 0.4991888065671413  |
| 0.8314058060850069 | 0.9153239088232163 | 0.5009971247891194  |
| 0.1663274495554199 | 0.0834735426921205 | 0.5793031664448555  |
| 0.1654518299120108 | 0.0821812893023496 | 0.4232596518110503  |
| 0.4160611761514193 | 0.0827322531848554 | 0.5788625887243767  |
| 0.4151668376715681 | 0.0823796906948554 | 0.4227199944003345  |
| 0.6650846751831618 | 0.0813320985184522 | 0.5780604262758039  |

|                    |                    |                    |
|--------------------|--------------------|--------------------|
| 0.6662698152108415 | 0.0833983854493406 | 0.4221494458394170 |
| 0.9157226372509423 | 0.0827038259166441 | 0.5790988285575384 |
| 0.9160014491316923 | 0.0820626750881009 | 0.4229573880707150 |
| 0.1717432355974361 | 0.3381809434575521 | 0.5774949854255232 |
| 0.1646262102108169 | 0.3310842882701263 | 0.4205562849721324 |
| 0.4162787722031551 | 0.3380255365167247 | 0.5775226384554638 |
| 0.4155769894998546 | 0.3307971768242384 | 0.4201473076756166 |
| 0.6651043217325368 | 0.3332918123825839 | 0.5780825545745444 |
| 0.6662748763461547 | 0.3324197495662764 | 0.4221849182702573 |
| 0.9176356213826130 | 0.3335303276275877 | 0.5781620745379885 |
| 0.9158794074263022 | 0.3327005669637624 | 0.4225235210920653 |
| 0.1716793957680825 | 0.5831579279970368 | 0.5774712489309899 |
| 0.1645501532347368 | 0.5830133127731449 | 0.4205061705157229 |
| 0.4156358918915897 | 0.5826086283995029 | 0.4191438249649210 |
| 0.6593949821560658 | 0.5815403937053159 | 0.5774196107948639 |
| 0.6671199937845530 | 0.5829519654411203 | 0.4206479314446102 |
| 0.9157101575326596 | 0.5824716384601311 | 0.5790853680612560 |
| 0.9159389647445542 | 0.5832759240030490 | 0.4229426140812991 |
| 0.1662318635777747 | 0.8322807385998833 | 0.5792373232012762 |
| 0.1653544305740304 | 0.8327348992915776 | 0.4232198356008654 |
| 0.4162101828990102 | 0.8278534591089947 | 0.5774848728715606 |
| 0.4156120105392132 | 0.8343095259276511 | 0.4200878750836151 |
| 0.6594121765678427 | 0.8275082502531965 | 0.5774243738230290 |
| 0.6671584863170292 | 0.8337625214100713 | 0.4206180989605851 |
| 0.9146159438890282 | 0.8320127808387452 | 0.5793858306242394 |
| 0.9156585660325670 | 0.8325257294043590 | 0.4233640721453479 |
| 0.4175189877070659 | 0.5837263319045762 | 0.5829310142499690 |

### Co-SMoS<sub>2</sub> with adsorption of CO

| X                  | Y                  | Z                  |
|--------------------|--------------------|--------------------|
| 0.0814150909139287 | 0.1654442223449511 | 0.5014965415391596 |
| 0.3296053400454783 | 0.1651510070176092 | 0.5017194950139503 |
| 0.5793006405184636 | 0.1635541828746403 | 0.5002594788365794 |
| 0.8302323756296022 | 0.1637630924448006 | 0.5000607586451551 |
| 0.0814891228839277 | 0.4146556195877987 | 0.4994688163697278 |
| 0.3341270427184294 | 0.4222375000421508 | 0.5002194551362998 |
| 0.5783435473665405 | 0.4140429900142334 | 0.4984598789172457 |
| 0.8297582235988025 | 0.4138215919022657 | 0.4996545930457600 |
| 0.0798774854803952 | 0.6638379066832614 | 0.4997254552674273 |
| 0.3326507679724435 | 0.6633539387763522 | 0.4957528263758159 |
| 0.5824835026336012 | 0.6677021146450326 | 0.4897162298342018 |
| 0.8285429539788800 | 0.6634660134467154 | 0.4988185905898282 |
| 0.0800298535016162 | 0.9143125975799642 | 0.5012870533803896 |
| 0.3298287424412502 | 0.9123573495660259 | 0.5009382121732373 |

|                    |                    |                    |
|--------------------|--------------------|--------------------|
| 0.5788069032341145 | 0.9121873096596161 | 0.4970152106253901 |
| 0.8288822813003878 | 0.9133931250247905 | 0.4996508225726792 |
| 0.1632322806516401 | 0.0811298865767257 | 0.5799360358221640 |
| 0.1638137108214194 | 0.0815622968392333 | 0.4235936461760437 |
| 0.4134866511288616 | 0.0799835588726326 | 0.5790139080956520 |
| 0.4112293595559431 | 0.0801960470474012 | 0.4233028408574807 |
| 0.6619660723708943 | 0.0777213276070505 | 0.5769747560518930 |
| 0.6639284824874725 | 0.0825981921077191 | 0.4213672738895770 |
| 0.9122236251040599 | 0.0796413665431159 | 0.5785219381321340 |
| 0.9158264949584475 | 0.0818767329819879 | 0.4226246849616802 |
| 0.1680028997185041 | 0.3365331904916020 | 0.5782422070217880 |
| 0.1669743229175199 | 0.3320381156362540 | 0.4227405077955477 |
| 0.4147661252445088 | 0.3372485471286545 | 0.5781625499527452 |
| 0.4101102797036150 | 0.3311178221296161 | 0.4224296818585338 |
| 0.6624615817689020 | 0.3316276506177782 | 0.5773815906193899 |
| 0.6625168549088544 | 0.3293192246788337 | 0.4216218745155950 |
| 0.9142276859279945 | 0.3312331625107345 | 0.5777220469211092 |
| 0.9136762203018686 | 0.3302394680536868 | 0.4217592837665336 |
| 0.1685440012041121 | 0.5816793081543532 | 0.5756973726579715 |
| 0.1620017596628942 | 0.5804462169285809 | 0.4200772368258634 |
| 0.4123163506859811 | 0.5803360385551919 | 0.4170823223049971 |
| 0.6546126637719810 | 0.5820015755467473 | 0.5739423553897631 |
| 0.6656432266477882 | 0.5777284322693386 | 0.4170564801543293 |
| 0.9120044019563025 | 0.5805512227267321 | 0.5775527519357787 |
| 0.9134351961043476 | 0.5804227123269238 | 0.4215007902652648 |
| 0.1629295049211299 | 0.8292072272283365 | 0.5788759094931826 |
| 0.1636249811097358 | 0.8316536178302723 | 0.4228321856432907 |
| 0.4157244214255393 | 0.8227398723590714 | 0.5773427455556562 |
| 0.4111890327013847 | 0.8310525477957155 | 0.4195120798132853 |
| 0.6519938057532833 | 0.8202916013561500 | 0.5751516543719232 |
| 0.6684356112572345 | 0.8374904041483537 | 0.4164195184417974 |
| 0.9110022748862452 | 0.8289880453880849 | 0.5779535377573829 |
| 0.9146608787339299 | 0.8319036979489431 | 0.4221537011961067 |
| 0.4515572178318775 | 0.6289288545942447 | 0.5931447853527985 |
| 0.3768060074029126 | 0.5645028984504086 | 0.6706071381228677 |
| 0.3282520221549386 | 0.5178986409592994 | 0.7202390209570660 |

**Co-SMoS<sub>2</sub> with adsorption of O<sub>2</sub>**

| <b>X</b>           | <b>Y</b>           | <b>Z</b>           |
|--------------------|--------------------|--------------------|
| 0.0826178237861071 | 0.1664313083416388 | 0.4994922255160604 |
| 0.3327087968390539 | 0.1668531925995263 | 0.4998641102766829 |
| 0.5821791868888878 | 0.1657616423836582 | 0.4996124840016591 |
| 0.8323170331800254 | 0.1655580536882240 | 0.4993157227948724 |
| 0.0832489368630850 | 0.4163720121404251 | 0.4979430737963009 |

|                    |                    |                    |
|--------------------|--------------------|--------------------|
| 0.3320022066757141 | 0.4174389348297914 | 0.4967933872885339 |
| 0.5822143931585912 | 0.4172367716937698 | 0.4991175294887347 |
| 0.8323429145824380 | 0.4161691222456792 | 0.4993304462458519 |
| 0.0826281109197000 | 0.6656491580651920 | 0.4994842437958018 |
| 0.3320340053713864 | 0.6639729441339804 | 0.4968406804774610 |
| 0.5797740379883887 | 0.6645384789501623 | 0.4994003928286050 |
| 0.8321533665896191 | 0.6661281779207499 | 0.4998490858211206 |
| 0.0826189684614850 | 0.9160597940407929 | 0.5001256213788340 |
| 0.3327035616670029 | 0.9152051009267053 | 0.4998683375747208 |
| 0.5822138915694811 | 0.9143514870866226 | 0.4991201940970047 |
| 0.8320858397245550 | 0.9154103538929048 | 0.4998383854380413 |
| 0.1660373760758893 | 0.0834001292034218 | 0.5780176626617203 |
| 0.1660410454105012 | 0.0826138443381926 | 0.4219334317991472 |
| 0.4158722218979680 | 0.0826032765239900 | 0.5779518596862669 |
| 0.4151532404375480 | 0.0822506108475312 | 0.4219111011677438 |
| 0.6654174233215747 | 0.0816133397923326 | 0.5773172218886136 |
| 0.6653608385324282 | 0.0820876268926681 | 0.4213799274564583 |
| 0.9157143138618595 | 0.0828645875608149 | 0.5777354873114278 |
| 0.9156122760881724 | 0.0818016210431003 | 0.4214987010587657 |
| 0.1684803735689355 | 0.3368466550994396 | 0.5765617825432103 |
| 0.1651429645614338 | 0.3313304036305787 | 0.4196486862418301 |
| 0.4160367405621950 | 0.3374815707659222 | 0.5768316723233137 |
| 0.4159216927699550 | 0.3322688256180922 | 0.4202736699054741 |
| 0.6654536199998204 | 0.3331263869324771 | 0.5773324308772330 |
| 0.6653680116946176 | 0.3326670432014014 | 0.4214238451963812 |
| 0.9167045348956646 | 0.3330513984463088 | 0.5767719334808488 |
| 0.9147057598914585 | 0.3320684661615186 | 0.4209220927207836 |
| 0.1684748351807052 | 0.5811381216212124 | 0.5765754562193531 |
| 0.1652514244396122 | 0.5833890748323821 | 0.4196793690321179 |
| 0.4166218736046681 | 0.5830366324632559 | 0.4200494993248374 |
| 0.6632702475730707 | 0.5826885881911352 | 0.5774037689953417 |
| 0.6656428345821184 | 0.5841222435315218 | 0.4212729272255388 |
| 0.9157844671482871 | 0.5822998813147523 | 0.5777547251374905 |
| 0.9156591716192647 | 0.5832203768476427 | 0.4214983643366459 |
| 0.1660002054001778 | 0.8320397360027479 | 0.5779901132320973 |
| 0.1660292912820557 | 0.8329139726185114 | 0.4219098140649674 |
| 0.4161071788820472 | 0.8279253166257852 | 0.5768729204834147 |
| 0.4159952134445099 | 0.8330154730893048 | 0.4203107177364434 |
| 0.6632278860513470 | 0.8298937522861404 | 0.5774129155866794 |
| 0.6654908773110851 | 0.8307736769965668 | 0.4212839246454428 |
| 0.9156070548087567 | 0.8325648244902070 | 0.5782273081346775 |
| 0.9160328504942891 | 0.8327576486148425 | 0.4218852628274248 |
| 0.3953703186275823 | 0.5722432659161291 | 0.5924330497727387 |
| 0.3707920279453170 | 0.5596284872006549 | 0.6859166429192090 |

0.4914666247695502 0.6196066813595731 0.6708656201861020

**ER mechanisms:**

**IS1**

| <b>X</b>           | <b>Y</b>           | <b>Z</b>           |
|--------------------|--------------------|--------------------|
| 0.0833681675415296 | 0.1668285869152139 | 0.4986235321397932 |
| 0.3335331598438531 | 0.1673524646220754 | 0.4990091998147649 |
| 0.5830111485039563 | 0.1661998218533509 | 0.4987558780097121 |
| 0.8330570203066522 | 0.1658490431928845 | 0.4984271944693142 |
| 0.0839162535416461 | 0.4166669174174918 | 0.4971474729760536 |
| 0.3327365292339701 | 0.4178952803276051 | 0.4959482611623187 |
| 0.5830038070085458 | 0.4176657841848228 | 0.4980896324873447 |
| 0.8330741291752457 | 0.4165583886902429 | 0.4983589882296407 |
| 0.0833602980915133 | 0.6659687002630275 | 0.4985836298419829 |
| 0.3326787034539302 | 0.6642361953440923 | 0.4959500778517272 |
| 0.5806390173489130 | 0.6650443390948930 | 0.4983102729622258 |
| 0.8328663505659905 | 0.6664955392670511 | 0.4987277146106333 |
| 0.0834157704332544 | 0.9164229310373859 | 0.4992068864526168 |
| 0.3334978653744445 | 0.9155577699451966 | 0.4990344639129365 |
| 0.5829553673641132 | 0.9147171632243145 | 0.4981573804036454 |
| 0.8328689158243660 | 0.9158053076245102 | 0.4987905532880287 |
| 0.1668224053265404 | 0.0837850899067034 | 0.5771029977718910 |
| 0.1668372950031721 | 0.0830694345835346 | 0.4210875262039354 |
| 0.4167484131494738 | 0.0830950187058252 | 0.5770688569503996 |
| 0.4159731733961165 | 0.0826363926438012 | 0.4211034566445757 |
| 0.6662125776629862 | 0.0819392814552441 | 0.5764409804798316 |
| 0.6660937923427304 | 0.0824856060601169 | 0.4205055106861111 |
| 0.9164661900770401 | 0.0830789846548560 | 0.5768320765131822 |
| 0.9164138125800362 | 0.0822730096195913 | 0.4205605345700401 |
| 0.1692325828869845 | 0.3372526804018359 | 0.5757841438979453 |
| 0.1658207066039642 | 0.3316996305484438 | 0.4188246739868256 |
| 0.4170584676110679 | 0.3382145745495716 | 0.5759243424899003 |
| 0.4165360897986222 | 0.3327214930560766 | 0.4194018413965375 |
| 0.6662775027249749 | 0.3337160002775208 | 0.5764130994965455 |
| 0.6661592517303215 | 0.3329835802397554 | 0.4204624311644986 |
| 0.9172136943424664 | 0.3333357657918863 | 0.5758246772578502 |
| 0.9155045070768604 | 0.3323193105472215 | 0.4200654487999216 |
| 0.1691164449190169 | 0.5814616131725165 | 0.5757699034674477 |
| 0.1658116747054971 | 0.5835095422754354 | 0.4188141641856722 |
| 0.4173209187497986 | 0.5834053710985130 | 0.4191031234181894 |
| 0.6641403550497876 | 0.5831598177948214 | 0.5763058730770299 |
| 0.6662449831220302 | 0.5843965655148731 | 0.4201628894144582 |
| 0.9164255395644949 | 0.5827646418626630 | 0.5767494354163542 |
| 0.9164585073857223 | 0.5835341662596769 | 0.4205019200761166 |

|                    |                    |                    |
|--------------------|--------------------|--------------------|
| 0.1667844443190389 | 0.8324020793385001 | 0.5771291900250926 |
| 0.1668788681005524 | 0.8332578467466250 | 0.4210742898134047 |
| 0.4169884054975174 | 0.8281937137298565 | 0.5759617975158355 |
| 0.4165326952202095 | 0.8332500438264080 | 0.4194266860434588 |
| 0.6641265897784930 | 0.8303717294006925 | 0.5763599385792436 |
| 0.6662709023850079 | 0.8314203419058582 | 0.4202126287977661 |
| 0.9162755016161244 | 0.8328443672834916 | 0.5771349255969501 |
| 0.9168933816910106 | 0.8332338339627164 | 0.4208155471962727 |
| 0.3966913157433645 | 0.5731045274352617 | 0.5914322388969199 |
| 0.3738894374311627 | 0.5617427741677754 | 0.6850490268654023 |
| 0.4943883551156319 | 0.6217857936987126 | 0.6693112431507977 |
| 0.3549778199751799 | 0.5511982227529985 | 0.8595405211802701 |
| 0.2665508557050652 | 0.5026727747264390 | 0.8294309233606040 |

## TS1

| X                  | Y                  | Z                  |
|--------------------|--------------------|--------------------|
| 0.0848701597974895 | 0.1682551947801159 | 0.4986324454582202 |
| 0.3334100470701600 | 0.1657614845792850 | 0.4975953166020161 |
| 0.5825296936097858 | 0.1648892916160278 | 0.4981134825020418 |
| 0.8329875490900136 | 0.1653536931975594 | 0.4983623214569519 |
| 0.0837166829277222 | 0.4182503417173961 | 0.4961770137245906 |
| 0.3345127935566410 | 0.4164866946387704 | 0.4918694932884122 |
| 0.5830946706610476 | 0.4163736558611930 | 0.4964609678195444 |
| 0.8327423241457694 | 0.4159004151929224 | 0.4976600970601694 |
| 0.0822014985513349 | 0.6662327008421229 | 0.4979462560675713 |
| 0.3309616571853979 | 0.6616523249890776 | 0.4965193384922628 |
| 0.5777347300542175 | 0.6612527509872876 | 0.4975599215018533 |
| 0.8314419705703884 | 0.6656287950516457 | 0.4988651972621909 |
| 0.0825765575121977 | 0.9161139891513911 | 0.4990761841936759 |
| 0.3324856617671159 | 0.9146152965407950 | 0.4985207473961707 |
| 0.5811315090749430 | 0.9126466609516156 | 0.4984011727401806 |
| 0.8321011567233327 | 0.9148786331939220 | 0.4993565026736845 |
| 0.1675644794832252 | 0.0840276441832231 | 0.5765368322048943 |
| 0.1655168282965107 | 0.0824905013194197 | 0.4206116730440640 |
| 0.4161746154162813 | 0.0822614327982905 | 0.5763752297364917 |
| 0.4158292373565259 | 0.0807563655764909 | 0.4200906089912450 |
| 0.6654558647114541 | 0.0807892731592403 | 0.5762514254213613 |
| 0.6656198271315716 | 0.0804583562077852 | 0.4205134759571151 |
| 0.9173068336120380 | 0.0836026022988889 | 0.5767826434374470 |
| 0.9168745684864135 | 0.0816962292337919 | 0.4210634853398929 |
| 0.1743441565799557 | 0.3443826162475006 | 0.5749841780233567 |
| 0.1640868600892347 | 0.3310742653560652 | 0.4172185558208099 |
| 0.4177283255759292 | 0.3370871590558480 | 0.5734570209880658 |
| 0.4175371308322724 | 0.3295189485100778 | 0.4166585916799405 |

|                    |                    |                    |
|--------------------|--------------------|--------------------|
| 0.6659618499245568 | 0.3329081767079742 | 0.5753712142749592 |
| 0.6665030399064946 | 0.3313045040745024 | 0.4194041779839707 |
| 0.9173359446150684 | 0.3335486681047897 | 0.5753049734872135 |
| 0.9149318740882534 | 0.3314254147439684 | 0.4194618557523668 |
| 0.1673246463887637 | 0.5826234631708402 | 0.5751978713031889 |
| 0.1661668088251744 | 0.5846070938126786 | 0.4184198492416371 |
| 0.4163760919193109 | 0.5831597474341237 | 0.4175544061444753 |
| 0.6606449572972650 | 0.5801330884952662 | 0.5759920327198742 |
| 0.6659996371795458 | 0.5845020234210381 | 0.4195135514123435 |
| 0.9154303504797667 | 0.5818131478709816 | 0.5763708853238967 |
| 0.9152859002927798 | 0.5834871937683772 | 0.4200780144544680 |
| 0.1660264889344844 | 0.8320512716067796 | 0.5767512619067290 |
| 0.1659184392422829 | 0.8334343918570895 | 0.4204757631479480 |
| 0.4141769243317839 | 0.8265396299539347 | 0.5755781889924378 |
| 0.4145965611094482 | 0.8300994137454509 | 0.4199362994067996 |
| 0.6613109402791864 | 0.8268844985036025 | 0.5760388702296524 |
| 0.6654185726567334 | 0.8296141207808319 | 0.4206770522115945 |
| 0.9155412347871419 | 0.8319100163468036 | 0.5774701382631662 |
| 0.9157722643436657 | 0.8326283073352982 | 0.4211598133473870 |
| 0.3742264425149671 | 0.5299234204659271 | 0.6000724766282346 |
| 0.3589297820528835 | 0.5395212637871389 | 0.6918566063520076 |
| 0.4490201778660096 | 0.6427739158667261 | 0.6627802986817506 |
| 0.4571908156922825 | 0.6513063849979013 | 0.8242077729531755 |
| 0.5074633898538965 | 0.6007326028020651 | 0.8095744591160673 |

## IM

| X                  | Y                  | Z                  |
|--------------------|--------------------|--------------------|
| 0.0856226663079130 | 0.1687275242769886 | 0.5002810509587255 |
| 0.3340976769665872 | 0.1681363385831459 | 0.5000623739933503 |
| 0.5837085956207801 | 0.1667101805129786 | 0.4999965609124991 |
| 0.8341558171775904 | 0.1668139080748003 | 0.5000413501944767 |
| 0.0852668642509279 | 0.4195481643258326 | 0.4980157077622910 |
| 0.3350162405852928 | 0.4188857302016565 | 0.4945343706818203 |
| 0.5849512684750977 | 0.4191242141583948 | 0.4982415141963721 |
| 0.8342248113940901 | 0.4175358340041129 | 0.4995233434535828 |
| 0.0843283699255072 | 0.6675789036311701 | 0.5001206378379673 |
| 0.3332496905420661 | 0.6631656197591304 | 0.4986628016415977 |
| 0.5801984433241236 | 0.6630634089387299 | 0.4990098047237909 |
| 0.8336663328291477 | 0.6674200217749569 | 0.5003009447470839 |
| 0.0841281534071812 | 0.9176341006303204 | 0.5008630731971402 |
| 0.3338752925185277 | 0.9163678942269275 | 0.5004857526165704 |
| 0.5824114743786566 | 0.9137647726595923 | 0.5000543138107234 |
| 0.8334472118450043 | 0.9164120151881369 | 0.5006217204084115 |
| 0.1681039709826574 | 0.0850705080044254 | 0.5787153051322702 |



|                    |                    |                    |
|--------------------|--------------------|--------------------|
| 0.1673333035199481 | 0.0841145226731446 | 0.4224771756610997 |
| 0.4174725095169399 | 0.0841379513133515 | 0.5783742026539582 |
| 0.4166267808658773 | 0.0830610551895744 | 0.4223136881866545 |
| 0.6665422355196093 | 0.0820443860047469 | 0.5779195779097877 |
| 0.6665197626396191 | 0.0818520751647022 | 0.4222978033397368 |
| 0.9179856052941834 | 0.0844563308397035 | 0.5783866031658957 |
| 0.9178318299565863 | 0.0832070365658496 | 0.4224785348441005 |
| 0.1728850355034570 | 0.3431434011046656 | 0.5764860789077859 |
| 0.1657767624805010 | 0.3323774823038725 | 0.4192889172895915 |
| 0.4204721218295748 | 0.3411110752585294 | 0.5761894180820674 |
| 0.4178069044999932 | 0.3321851180933194 | 0.4192390893899733 |
| 0.6672942268199682 | 0.3347942903389842 | 0.5771956968115488 |
| 0.6676848490665115 | 0.3331133953296745 | 0.4212552056606189 |
| 0.9187499873774978 | 0.3349931306295210 | 0.5771205164689853 |
| 0.9162541348330172 | 0.3330227165724677 | 0.4212144410988832 |
| 0.1697648458599998 | 0.5833259024884033 | 0.5774390554459675 |
| 0.1686163471788786 | 0.5864436482028956 | 0.4204612422891765 |
| 0.4177524842222730 | 0.5845251859364151 | 0.4197054975621561 |
| 0.6638128429292407 | 0.5829733900833911 | 0.5776137754840571 |
| 0.6680995095671387 | 0.5862191999502977 | 0.4208006472476211 |
| 0.9171326725133480 | 0.5834923424562634 | 0.5782302008696359 |
| 0.9176607506078038 | 0.5849528674448192 | 0.4218925403461197 |
| 0.1674394200287392 | 0.8336294376182201 | 0.5787913757688481 |
| 0.1674341800661718 | 0.8346723792410777 | 0.4224833445056277 |
| 0.4158066362931432 | 0.8282067511575990 | 0.5773740189226785 |
| 0.4155182328953708 | 0.8313956948269082 | 0.4217918938682517 |
| 0.6634790824922072 | 0.8283911549340797 | 0.5774849735932558 |
| 0.6666232748273867 | 0.8309773036236705 | 0.4219916674759744 |
| 0.9168838955318342 | 0.8335521984969809 | 0.5789145974356845 |
| 0.9176867051609556 | 0.8344337242578316 | 0.4225656383122195 |
| 0.3797935133485825 | 0.5193314992664886 | 0.6100686949757386 |
| 0.3577845545408181 | 0.4761901603989692 | 0.7029123700202924 |
| 0.4570948159537181 | 0.6573398253290059 | 0.6632999145366635 |
| 0.4464131444299574 | 0.6349264860566634 | 0.7775856880427194 |
| 0.4221741372979861 | 0.5923077048965923 | 0.7216352675579677 |

**TS2**

| <b>X</b>           | <b>Y</b>           | <b>Z</b>           |
|--------------------|--------------------|--------------------|
| 0.0877198795396268 | 0.1702497825285931 | 0.4986953585818909 |
| 0.3372491887484160 | 0.1706939382936383 | 0.4986379395188933 |
| 0.5864921466753330 | 0.1691974609031703 | 0.4987703202146178 |
| 0.8371945686819657 | 0.1690626796314163 | 0.4989189385011769 |
| 0.0890143661513818 | 0.4202665642057752 | 0.4990663442518652 |
| 0.3368905279729333 | 0.4194149936359466 | 0.4944974877687542 |

|                    |                    |                    |
|--------------------|--------------------|--------------------|
| 0.5859133460238866 | 0.4203753527943164 | 0.4990956359959213 |
| 0.8369341117276433 | 0.4190178780189839 | 0.5007176416925532 |
| 0.0876197428937431 | 0.6687991891835878 | 0.5002255487471814 |
| 0.3385773103877696 | 0.6700944113983027 | 0.4971016475948601 |
| 0.5856486461139241 | 0.6698793041073614 | 0.4973229782027104 |
| 0.8358020836862394 | 0.6687113808857390 | 0.5005021029595298 |
| 0.0862804772103374 | 0.9183357740555209 | 0.4990524734172936 |
| 0.3355760447881764 | 0.9209848936589679 | 0.4962163368800318 |
| 0.5864677688491042 | 0.9194279890427594 | 0.4963341912702219 |
| 0.8385367511480197 | 0.9202547040466696 | 0.4970545169222972 |
| 0.1704358028757369 | 0.0860612599835093 | 0.5768469232365163 |
| 0.1699492805924976 | 0.0853740467570745 | 0.4210872862265873 |
| 0.4192323878199815 | 0.0855064618900485 | 0.5762717669127895 |
| 0.4207731695754121 | 0.0887061600652785 | 0.4196608320098889 |
| 0.6690679206216004 | 0.0838626756545011 | 0.5762152717619387 |
| 0.6713034925086490 | 0.0880656612433341 | 0.4198984917808772 |
| 0.9208028392561047 | 0.0854867423712520 | 0.5766095364037582 |
| 0.9217209842396131 | 0.0876647974484044 | 0.4200740294558471 |
| 0.1761724484186402 | 0.3408130690284139 | 0.5762213066258468 |
| 0.1684195050085293 | 0.3349543749163146 | 0.4190318282963048 |
| 0.4193558623845846 | 0.3413712444528443 | 0.5763007275843961 |
| 0.4211332504845515 | 0.3354080471574576 | 0.4190553491219830 |
| 0.6683184609862280 | 0.3350571054339753 | 0.5776331532589012 |
| 0.6713222918287728 | 0.3371042866797183 | 0.4219088108127380 |
| 0.9215744873320659 | 0.3351435654833779 | 0.5776999037585639 |
| 0.9205134530447552 | 0.3368504495703917 | 0.4219277186496910 |
| 0.1759562190824866 | 0.5863889063273717 | 0.5773604202863751 |
| 0.1704265836331089 | 0.5865292954680115 | 0.4208695716400327 |
| 0.4207812864485376 | 0.5869460087621832 | 0.4191910397672629 |
| 0.6645302623576583 | 0.5859945734820613 | 0.5776475883418328 |
| 0.6711048182946371 | 0.5866317151643159 | 0.4210250856083632 |
| 0.9204410464038801 | 0.5857540154305241 | 0.5787784969921503 |
| 0.9198520955266858 | 0.5851644127127997 | 0.4228512120347929 |
| 0.1717112859981498 | 0.8368764111131526 | 0.5769659366004092 |
| 0.1668631884956966 | 0.8332544064216023 | 0.4203360006642284 |
| 0.4193342988239053 | 0.8386638726606179 | 0.5727389798201017 |
| 0.4183954359845430 | 0.8355585974452708 | 0.4180846081302149 |
| 0.6718763447998910 | 0.8380777172742312 | 0.5735068987171985 |
| 0.6711627601280696 | 0.8357805143342673 | 0.4183092600773861 |
| 0.9197132493163167 | 0.8368257230588013 | 0.5773030108386550 |
| 0.9200898577640331 | 0.8332660060303140 | 0.4208166662105554 |
| 0.4229243489339112 | 0.5876261005938446 | 0.5898803256286200 |
| 0.3835936303535721 | 0.4861367720869384 | 0.6876639231450455 |
| 0.4710370227423086 | 0.6920060079944479 | 0.6527245900879594 |

|                    |                    |                    |
|--------------------|--------------------|--------------------|
| 0.4648028685840597 | 0.6323582691881411 | 0.7723958351372640 |
| 0.4322763303818739 | 0.5811494975995989 | 0.7203204966630271 |

**FS1**

| <b>X</b>           | <b>Y</b>           | <b>Z</b>           |
|--------------------|--------------------|--------------------|
| 0.0845829457848215 | 0.1683044613417460 | 0.4992041617006522 |
| 0.3342857652207613 | 0.1676432016389797 | 0.4975963318234540 |
| 0.5841858133403551 | 0.1676625488499845 | 0.4983472854878437 |
| 0.8344153604946800 | 0.1674642947445487 | 0.4991584416098558 |
| 0.0865138512373807 | 0.4188836693179807 | 0.4971604081296451 |
| 0.3329188650763750 | 0.4156544326012868 | 0.4934915310772363 |
| 0.5834118390688509 | 0.4183985298799739 | 0.4981875817686568 |
| 0.8344568431683055 | 0.4182197433556304 | 0.4992621196269494 |
| 0.0845910668380977 | 0.6676200355648273 | 0.4993715857542015 |
| 0.3329675620677625 | 0.6683161581054656 | 0.4936539630006367 |
| 0.5762048018340080 | 0.6637727247870520 | 0.5003158213735710 |
| 0.8323055515673931 | 0.6675600843669710 | 0.5005324873257951 |
| 0.0832098645356218 | 0.9172641909531930 | 0.4996382530012256 |
| 0.3342636258498488 | 0.9179030534725323 | 0.4976036182993463 |
| 0.5834183552783684 | 0.9162524521736491 | 0.4981326537065054 |
| 0.8323814276637984 | 0.9161500467469098 | 0.5003409363046192 |
| 0.1686549045586559 | 0.0852584596605505 | 0.5769119958510673 |
| 0.1657486067832339 | 0.0832209660545595 | 0.4209320074142446 |
| 0.4173020329748589 | 0.0843131744191981 | 0.5761332079331857 |
| 0.4180282371577094 | 0.0845530740011771 | 0.4197498354209894 |
| 0.6666765181784113 | 0.0833216275561769 | 0.5765844007886946 |
| 0.6683702892285709 | 0.0842808517509644 | 0.4205891565656739 |
| 0.9176829992126327 | 0.0847996879831327 | 0.5776824941891732 |
| 0.9166283751881754 | 0.0823605305737967 | 0.4217085277938941 |
| 0.1743581761396630 | 0.3421145225809452 | 0.5763179714375668 |
| 0.1648311722049997 | 0.3311902479631966 | 0.4180661547532655 |
| 0.4162745320689137 | 0.3365442092046110 | 0.5744917339709116 |
| 0.4192868617168218 | 0.3328451559576376 | 0.4175830452272120 |
| 0.6666128840221773 | 0.3344802793927183 | 0.5766130284494030 |
| 0.6684286101201792 | 0.3352631507596004 | 0.4206942583933795 |
| 0.9198556842633659 | 0.3354903573124826 | 0.5763512006805596 |
| 0.9168551719065365 | 0.3340959726538941 | 0.4208337721397234 |
| 0.1742655135667366 | 0.5833872595481223 | 0.5765013905401417 |
| 0.1648452664738457 | 0.5850408838025571 | 0.4182399149046955 |
| 0.4167694071025834 | 0.5839478448722728 | 0.4184467426578580 |
| 0.6619455605983590 | 0.5828344638045180 | 0.5776202681259258 |
| 0.6654320677621582 | 0.5870070809818052 | 0.4219882392945161 |
| 0.9176882157605375 | 0.5842257938737531 | 0.5778447342334363 |
| 0.9165537132265292 | 0.5856541073833915 | 0.4219409350266635 |

|                    |                    |                    |
|--------------------|--------------------|--------------------|
| 0.1687690933774542 | 0.8348790802558373 | 0.5769787994787619 |
| 0.1656827950867457 | 0.8337266387218351 | 0.4210088669259193 |
| 0.4162531321230256 | 0.8310797817542896 | 0.5744505950250772 |
| 0.4190541368989655 | 0.8373466509341316 | 0.4176104594043785 |
| 0.6622598613880136 | 0.8306827125050873 | 0.5774605918911144 |
| 0.6653617615494405 | 0.8296251886402619 | 0.4218741137753113 |
| 0.9167572519358522 | 0.8341090737247875 | 0.5786021603249475 |
| 0.9156032403287102 | 0.8333669410778808 | 0.4221736239315622 |
| 0.3718321252831240 | 0.5617489782205557 | 0.5905290048482915 |
| 0.2970024719388059 | 0.3804168690018979 | 0.7383752855426394 |
| 0.4631390324953509 | 0.6117990540714764 | 0.6552502129702326 |
| 0.3808081237789376 | 0.5553815103042253 | 0.8062564120881528 |
| 0.3399486035735120 | 0.4689182717959307 | 0.7716676340112683 |

## IS2

| X                  | Y                  | Z                  |
|--------------------|--------------------|--------------------|
| 0.0814221318017458 | 0.1736975098825317 | 0.4944778948707413 |
| 0.3318030724610450 | 0.1743079313644715 | 0.4959108907997195 |
| 0.5811795452956688 | 0.1736069012369932 | 0.4960746451733246 |
| 0.8316170677684190 | 0.1738271083801720 | 0.4952510188925822 |
| 0.0829527110914977 | 0.4245936883118883 | 0.4951673392589567 |
| 0.3309925929655637 | 0.4219579789135246 | 0.4905304908083824 |
| 0.5804672240953158 | 0.4249894183503684 | 0.4941706298161059 |
| 0.8318294115164769 | 0.4243354606336716 | 0.4962062766363194 |
| 0.0831696317181018 | 0.6737432565765966 | 0.4973326014087620 |
| 0.3354246887631076 | 0.6700047616803420 | 0.4972254978047919 |
| 0.5835137960968910 | 0.6743463723423748 | 0.4905196452782201 |
| 0.8311394541278282 | 0.6736692036010986 | 0.4961403182694376 |
| 0.0821308424072324 | 0.9233654461298926 | 0.4963925999527695 |
| 0.3318827042489374 | 0.9223176971463407 | 0.4971917366213308 |
| 0.5810403680124023 | 0.9223649071930169 | 0.4950012067013916 |
| 0.8317926805808821 | 0.9239893109550714 | 0.4944927835839151 |
| 0.1646830650319281 | 0.0912972909654945 | 0.5736783728199364 |
| 0.1654858927557465 | 0.0892620565212546 | 0.4177054416839963 |
| 0.4151448600486931 | 0.0908963652433184 | 0.5745123064125651 |
| 0.4139762030015766 | 0.0883745867044164 | 0.4185398451223030 |
| 0.6647279257150983 | 0.0893776003548308 | 0.5734642613499047 |
| 0.6640339859879006 | 0.0905016300571206 | 0.4175192286581445 |
| 0.9151034134802158 | 0.0903752366171020 | 0.5730213674222066 |
| 0.9146815957481033 | 0.0907124501310498 | 0.4166079208931659 |
| 0.1682920851647748 | 0.3425817782204535 | 0.5713940975144771 |
| 0.1617643241585015 | 0.3390406735660492 | 0.4146499987450490 |
| 0.4153663994546312 | 0.3473799617853901 | 0.5731121053557525 |
| 0.4145845808198650 | 0.3375884103174773 | 0.4149958653269443 |

|                    |                    |                    |
|--------------------|--------------------|--------------------|
| 0.6636698970470012 | 0.3415777851291864 | 0.5733256466102045 |
| 0.6653555471378326 | 0.3402981557377561 | 0.4178213239933854 |
| 0.9158548802545501 | 0.3405749468396961 | 0.5735758602973194 |
| 0.9150017768271241 | 0.3415969401193202 | 0.4176140405277283 |
| 0.1685130549148800 | 0.5892397863524607 | 0.5744265412685818 |
| 0.1694049855554693 | 0.5930955960560705 | 0.4188807249897653 |
| 0.4152481330792273 | 0.5902135082865672 | 0.4153598312162845 |
| 0.6576497127280343 | 0.5898409071387724 | 0.5732493797305208 |
| 0.6683222928507099 | 0.5910406106621460 | 0.4150727211071993 |
| 0.9146524086587596 | 0.5904091040707765 | 0.5747097780522179 |
| 0.9170895383454803 | 0.5916683404559132 | 0.4187747906604659 |
| 0.1654235560020075 | 0.8403770776698207 | 0.5753815413608855 |
| 0.1659359403042924 | 0.8394710434137710 | 0.4189876984055416 |
| 0.4166321178113738 | 0.8371024378534692 | 0.5742947199146892 |
| 0.4124569174274939 | 0.8358109288726384 | 0.4187744084572048 |
| 0.6628674317396885 | 0.8369999314221778 | 0.5713857493831009 |
| 0.6665789702164149 | 0.8433983220953994 | 0.4145277367405059 |
| 0.9142986091281554 | 0.8409270310439765 | 0.5737620429957185 |
| 0.9160908128506271 | 0.8397362035954521 | 0.4178097483804757 |
| 0.4367930604515817 | 0.5684502383091844 | 0.5873909764430276 |
| 0.3880683589109363 | 0.6158664555500573 | 0.6500472067053734 |
| 0.4701346948164020 | 0.5230253298522949 | 0.7872940404179835 |
| 0.4950052686238166 | 0.5038244252908154 | 0.7355171641606232 |

### TS3

| X                  | Y                  | Z                  |
|--------------------|--------------------|--------------------|
| 0.0814199969999976 | 0.1737000050000006 | 0.4944800139999969 |
| 0.3318000140000024 | 0.1743099990000019 | 0.4959099889999975 |
| 0.5811799760000014 | 0.1736100019999967 | 0.4960699980000028 |
| 0.8316199779999991 | 0.1738300029999991 | 0.4952499870000010 |
| 0.0829500030000006 | 0.4245899920000014 | 0.4951699969999978 |
| 0.3309899870000024 | 0.4219599959999982 | 0.4905300140000007 |
| 0.5804700260000004 | 0.4249899980000009 | 0.4941700099999976 |
| 0.8318300250000021 | 0.4243299959999973 | 0.4962100090000020 |
| 0.0831699969999988 | 0.6737400290000011 | 0.4973300099999988 |
| 0.3354299960000020 | 0.6700099709999989 | 0.4972200099999994 |
| 0.5835099820000025 | 0.6743500230000024 | 0.4905199999999964 |
| 0.8311399820000034 | 0.6736699940000008 | 0.4961400030000006 |
| 0.0821299999999994 | 0.9233599900000016 | 0.4963900150000028 |
| 0.3318800030000020 | 0.9223200079999998 | 0.4971899989999996 |
| 0.5810400250000001 | 0.9223600030000014 | 0.4950000050000013 |
| 0.8317899700000027 | 0.9239900110000007 | 0.4944899979999987 |
| 0.1646800039999974 | 0.0913000030000006 | 0.5736799840000018 |
| 0.1654900010000020 | 0.0892599969999992 | 0.4176999929999993 |

|                    |                    |                    |
|--------------------|--------------------|--------------------|
| 0.4151400029999976 | 0.0908999959999974 | 0.5745099780000018 |
| 0.4139800069999993 | 0.0883700030000014 | 0.4185400009999966 |
| 0.6647300119999997 | 0.0893800039999988 | 0.5734599829999993 |
| 0.6640300150000016 | 0.0904999970000020 | 0.4175199869999985 |
| 0.9150999780000008 | 0.0903699990000035 | 0.5730199810000016 |
| 0.9146800039999974 | 0.0907099989999978 | 0.4166100030000023 |
| 0.1682900039999993 | 0.3425799910000009 | 0.5713899730000023 |
| 0.1617600020000012 | 0.3390400110000016 | 0.4146499929999975 |
| 0.4153699869999983 | 0.3473800120000021 | 0.5731099839999985 |
| 0.4145900010000005 | 0.3375900090000030 | 0.4149999919999984 |
| 0.6636700030000000 | 0.3415800029999971 | 0.5733299850000009 |
| 0.6653599739999976 | 0.3402999939999987 | 0.4178200070000030 |
| 0.9158499839999975 | 0.3405700030000034 | 0.5735800269999984 |
| 0.9150000209999972 | 0.3416000010000033 | 0.4176099900000024 |
| 0.1685100050000016 | 0.5892400150000014 | 0.5744299890000022 |
| 0.1694100050000031 | 0.5931000109999971 | 0.4188799860000002 |
| 0.4152500029999970 | 0.5902100209999972 | 0.4153600039999999 |
| 0.6576499940000033 | 0.5898399949999984 | 0.5732499960000013 |
| 0.6683200000000014 | 0.5910400149999973 | 0.4150699970000032 |
| 0.9146500230000001 | 0.5904099939999981 | 0.5747100110000005 |
| 0.1654199959999971 | 0.8403800130000008 | 0.5753800270000013 |
| 0.1659400019999993 | 0.8394700289999975 | 0.4189899859999996 |
| 0.4166299999999978 | 0.8371000289999984 | 0.5742999909999966 |
| 0.4124599989999995 | 0.8358100060000028 | 0.4187699849999972 |
| 0.6628699899999972 | 0.8370000119999971 | 0.5713899730000023 |
| 0.6665800210000015 | 0.8434000020000028 | 0.4145300090000034 |
| 0.9143000250000028 | 0.8409299850000024 | 0.5737599730000014 |
| 0.9160900119999980 | 0.8397399779999972 | 0.4178099929999987 |
| 0.4396569072007309 | 0.5671684217131181 | 0.5875868938437961 |
| 0.4019448315635772 | 0.6196291610018525 | 0.6525586280036662 |
| 0.3638067383880690 | 0.6187444054877861 | 0.8057671906677386 |
| 0.3940721143036384 | 0.5579745318166804 | 0.7791955615969457 |

## FS2

| X                  | Y                  | Z                  |
|--------------------|--------------------|--------------------|
| 0.0806742332910318 | 0.1752090013553665 | 0.4956087699962911 |
| 0.3302358868026101 | 0.1751555958645240 | 0.4957695532585745 |
| 0.5800165429047414 | 0.1748329416729221 | 0.4954962158351389 |
| 0.8302811303365139 | 0.1747189619682613 | 0.4952834229485259 |
| 0.0810239789800056 | 0.4245539390855747 | 0.4937641261982628 |
| 0.3296023124439299 | 0.4264006566781555 | 0.4919994324970728 |
| 0.5791103213321507 | 0.4256765395002749 | 0.4947179960436330 |
| 0.8302004294289327 | 0.4251484204648669 | 0.4954831923934653 |
| 0.0809024269838221 | 0.6741705527111396 | 0.4954628328199302 |

|                    |                    |                    |
|--------------------|--------------------|--------------------|
| 0.3310836541316163 | 0.6735106841949799 | 0.4900524501258773 |
| 0.5779974935875211 | 0.6748701393124213 | 0.4920341618057056 |
| 0.8296711061614270 | 0.6747917154822645 | 0.4957638480414507 |
| 0.0803955092050650 | 0.9245399065957547 | 0.4963083792921661 |
| 0.3308723560047083 | 0.9240529684885258 | 0.4953823177036361 |
| 0.5802242130746940 | 0.9237333472173130 | 0.4936769647308888 |
| 0.8295316493581242 | 0.9241819413541196 | 0.4956044928607994 |
| 0.1638478536887371 | 0.0919441767821037 | 0.5740869109134565 |
| 0.1635339509682741 | 0.0909505932124074 | 0.4180249761519718 |
| 0.4137159570625761 | 0.0910011057152237 | 0.5737291537614805 |
| 0.4131354780521185 | 0.0913986389054753 | 0.4176957648264571 |
| 0.6629221175616539 | 0.0899021605650447 | 0.5727903621613313 |
| 0.6640595344244611 | 0.0926273292348261 | 0.4169048611422459 |
| 0.9134173438650337 | 0.0915045119768497 | 0.5736408748261350 |
| 0.9138205657965248 | 0.0910374394909637 | 0.4176098965425004 |
| 0.1682068602775453 | 0.3466492034224232 | 0.5723526609415427 |
| 0.1622565330266057 | 0.3393448552755159 | 0.4151934658053794 |
| 0.4125175387614930 | 0.3464549190780861 | 0.5722103681259055 |
| 0.4129676555127870 | 0.3402535787501710 | 0.4159546901069213 |
| 0.6627734891869642 | 0.3423370047751618 | 0.5731809828587796 |
| 0.6633212149947457 | 0.3417875910361221 | 0.4174658365545146 |
| 0.9148744748601058 | 0.3421191754815945 | 0.5728179502469836 |
| 0.9123639776900301 | 0.3410021420178064 | 0.4168766704546235 |
| 0.1700070477661170 | 0.5901808812722380 | 0.5714737600304292 |
| 0.1609213854599832 | 0.5906784120845254 | 0.4146514290257338 |
| 0.4137206406572710 | 0.5907110232624551 | 0.4133039859699213 |
| 0.6582005622347104 | 0.5922408000939016 | 0.5721292415139042 |
| 0.6644218451803965 | 0.5918002368871546 | 0.4159656454056829 |
| 0.9138942595900833 | 0.5914633964162590 | 0.5737494034436551 |
| 0.9136122079272104 | 0.5920702389663471 | 0.4177203726584556 |
| 0.1645568164204309 | 0.8405531914030779 | 0.5738614396291898 |
| 0.1635896986945627 | 0.8414168312384599 | 0.4179548721459951 |
| 0.4145969177768550 | 0.8347951899046037 | 0.5713916350949109 |
| 0.4140315203021177 | 0.8435472080212997 | 0.4145256605729402 |
| 0.6578715524779758 | 0.8364513838884600 | 0.5722811515221550 |
| 0.6651953044945341 | 0.8420807889362363 | 0.4152241174161735 |
| 0.9128360971029251 | 0.8411361350442422 | 0.5740736175704422 |
| 0.9139829590599586 | 0.8415419883454101 | 0.4180431541397784 |
| 0.4069140703471968 | 0.5969515022426789 | 0.5803821221911681 |
| 0.4354818295061416 | 0.5695875620673997 | 0.6848907700302872 |
| 0.5394945935938361 | 0.4837640901080164 | 0.7392328998852968 |
| 0.4883631216511667 | 0.5259974741510343 | 0.7114711977822223 |

**NER mechanisms:**

## IS1

| X                  | Y                  | Z                   |
|--------------------|--------------------|---------------------|
| 0.0842638265928652 | 0.1678466428555917 | 0.5031590226492302  |
| 0.3342800548034841 | 0.1683266981309186 | 0.5033677135402622  |
| 0.5836879613812964 | 0.1671247882995648 | 0.5033127340691628  |
| 0.8339339985203149 | 0.1669100998503812 | 0.5031504895775323  |
| 0.0848488519097062 | 0.4177346633940874 | 0.5020584824493244  |
| 0.3337266326229109 | 0.4190669257458348 | 0.5004421685881385  |
| 0.5838819450491924 | 0.4187243142030949 | 0.5026684077615503  |
| 0.8338671781279925 | 0.4173733127898825 | 0.5031315222573342  |
| 0.0841617879607518 | 0.6668809976478776 | 0.5031618107671599  |
| 0.3336709326237411 | 0.6653967728520539 | 0.5004201563668529  |
| 0.5815136214784764 | 0.6661857557118036 | 0.5030929557292686  |
| 0.8337995702520753 | 0.6674852437661444 | 0.5034753242126636  |
| 0.0841994986868564 | 0.9173341883063671 | 0.5034541322098774  |
| 0.3341787724968361 | 0.9165214073653614 | 0.5033875001629032  |
| 0.5838297170643143 | 0.9159514806210000 | 0.5027333968812360  |
| 0.8337826336494281 | 0.9167723110318168 | 0.5034650500319527  |
| 0.1676238035469068 | 0.0845523963484393 | 0.5814866247316574  |
| 0.1675076294669686 | 0.0840483744771044 | 0.4253984624872845  |
| 0.4172291000369678 | 0.0838995594882125 | 0.5814611795002563  |
| 0.4167575590152541 | 0.0836288474012368 | 0.4254693993165171  |
| 0.6669803063219194 | 0.0831422251181602 | 0.5811198884012038  |
| 0.6670680154242420 | 0.0836745477782156 | 0.4251126307880208  |
| 0.9174306335958320 | 0.0840382648360755 | 0.5814667604618464  |
| 0.9171636154927042 | 0.0833113309342027 | 0.4252121031132311  |
| 0.1704397601666059 | 0.3382481504578992 | 0.5803804871758130  |
| 0.1665607264640288 | 0.3328357387828344 | 0.42345111076574942 |
| 0.4178194617021272 | 0.3390711234891392 | 0.5803743068976351  |
| 0.4175546961633742 | 0.3339654930679219 | 0.4238776188023763  |
| 0.6668522026046065 | 0.3344938061155653 | 0.5810162834902443  |
| 0.6669827411915501 | 0.3338841700564164 | 0.4251064302989596  |
| 0.9180464426988285 | 0.3341993450462702 | 0.5806547054043856  |
| 0.9164878041206073 | 0.3334095427886273 | 0.4248887118772645  |
| 0.1704012782097609 | 0.5828626797055041 | 0.5803755935938342  |
| 0.1665252838868640 | 0.5843325205589228 | 0.4234536217750544  |
| 0.4184590475333345 | 0.5846211862889368 | 0.4236519711088136  |
| 0.6650116316172215 | 0.5840903331109897 | 0.5809857567033623  |
| 0.6673618295708984 | 0.5857951179726578 | 0.4249101850864198  |
| 0.9173452100603583 | 0.5836427269988408 | 0.5814588947713785  |
| 0.9170387059941270 | 0.5841358678942259 | 0.4252150402854545  |
| 0.1674685835277957 | 0.8335042169498098 | 0.5814959181995993  |
| 0.1674395893216873 | 0.8338332189568960 | 0.4253773895976818  |
| 0.4177451208405704 | 0.8293838837310609 | 0.5804028704244003  |



|                    |                    |                    |
|--------------------|--------------------|--------------------|
| 0.4175421848201064 | 0.8344118289591054 | 0.4238669686123472 |
| 0.6649479561784836 | 0.8317130214287972 | 0.5809793075391436 |
| 0.6671487339736891 | 0.8325203141841656 | 0.4249370137563605 |
| 0.9176218366927080 | 0.8339964352079116 | 0.5815884998378029 |
| 0.9173812884945516 | 0.8338629056530091 | 0.4253240584627561 |
| 0.3971289128935987 | 0.5739699777861167 | 0.5961517914940007 |
| 0.3738230263962652 | 0.5623529016972699 | 0.6898893905297209 |
| 0.4943777975742367 | 0.6231052686977194 | 0.6740118358081347 |
| 0.1260009022092843 | 0.4093018542001854 | 0.7881518758289237 |
| 0.7234427750241280 | 0.7289592330539854 | 0.7947013020150506 |
| 0.0979503914797180 | 0.4182431028760238 | 0.7350551368773462 |
| 0.7572164434677864 | 0.7535127863297741 | 0.7408380680337655 |

### TS1

| X                  | Y                  | Z                  |
|--------------------|--------------------|--------------------|
| 0.0831099970000011 | 0.1666200009999983 | 0.5029799940000004 |
| 0.3332099909999968 | 0.1670600030000031 | 0.5032500029999980 |
| 0.5827500219999990 | 0.1660200059999966 | 0.5031600000000012 |
| 0.8328899739999968 | 0.1658300010000033 | 0.5029699800000031 |
| 0.0836699979999977 | 0.4164600069999977 | 0.5016300079999993 |
| 0.3323599989999977 | 0.4174500109999997 | 0.5000900029999968 |
| 0.5826900010000031 | 0.4173400099999966 | 0.5025100109999983 |
| 0.8329200149999991 | 0.4164800049999968 | 0.5029900070000011 |
| 0.0832199979999970 | 0.6658499839999976 | 0.5030000209999983 |
| 0.3324399890000010 | 0.6640700100000032 | 0.5001000170000012 |
| 0.5803999899999965 | 0.6647300119999997 | 0.5025600190000006 |
| 0.8327699900000027 | 0.6663799880000028 | 0.5032299760000001 |
| 0.0831699969999988 | 0.9163100119999967 | 0.5034499759999989 |
| 0.3332700130000034 | 0.9154599909999986 | 0.5032200220000007 |
| 0.5827400089999983 | 0.9144999979999966 | 0.5024099950000007 |
| 0.8326399919999972 | 0.9156399969999995 | 0.5031600000000012 |
| 0.1665399970000010 | 0.0835499989999988 | 0.5814200040000017 |
| 0.1665699930000031 | 0.0829799990000026 | 0.4252800049999976 |
| 0.4162999990000031 | 0.0827800040000000 | 0.5813699959999994 |
| 0.4159300029999998 | 0.0826700029999969 | 0.4253300129999999 |
| 0.6658499839999976 | 0.0816499960000030 | 0.5808100100000004 |
| 0.6661199930000024 | 0.0826100040000028 | 0.4249500040000029 |
| 0.9162700179999987 | 0.0828500020000007 | 0.5812600260000025 |
| 0.9161900280000026 | 0.0823699979999972 | 0.4250200090000006 |
| 0.1690099979999999 | 0.3368700150000024 | 0.5801500079999968 |
| 0.1652400050000011 | 0.3313499989999968 | 0.4231300060000009 |
| 0.4165599939999964 | 0.3377499879999987 | 0.5801799890000012 |
| 0.4163500069999983 | 0.3323700130000020 | 0.4236100019999966 |
| 0.6658700110000026 | 0.3334200079999974 | 0.5809000129999973 |

|                    |                    |                    |
|--------------------|--------------------|--------------------|
| 0.6661599870000002 | 0.3328999880000012 | 0.4249899980000009 |
| 0.9171199800000025 | 0.3332799969999982 | 0.5804799799999998 |
| 0.9151999950000018 | 0.3323099910000024 | 0.4246299859999993 |
| 0.1691800059999977 | 0.5813699959999994 | 0.5801399950000032 |
| 0.1652999969999982 | 0.5831599830000016 | 0.4231399889999991 |
| 0.4170300070000010 | 0.5830299850000031 | 0.4232600030000028 |
| 0.6638600229999980 | 0.5829300279999998 | 0.5806699990000013 |
| 0.6662899849999987 | 0.5840600129999984 | 0.4246299859999993 |
| 0.9164400100000023 | 0.5828099849999973 | 0.5813000200000005 |
| 0.9162799719999982 | 0.5833699699999997 | 0.4250499899999979 |
| 0.1666000040000029 | 0.8324599860000035 | 0.5813900229999973 |
| 0.1665499960000006 | 0.8330100180000031 | 0.4253099860000020 |
| 0.4166899920000020 | 0.8281000260000013 | 0.5801299809999989 |
| 0.4163199959999986 | 0.8331099749999993 | 0.4235999879999994 |
| 0.6637899879999977 | 0.8300399780000020 | 0.5806499720000033 |
| 0.6661599870000003 | 0.8310499789999994 | 0.4244799909999983 |
| 0.9161700009999976 | 0.8327999710000000 | 0.5815500020000002 |
| 0.9165999889999981 | 0.8329899909999980 | 0.4252099990000033 |
| 0.3960100110000013 | 0.5723599789999980 | 0.5954999920000006 |
| 0.2960796450351534 | 0.5170607703292385 | 0.6539966344359376 |
| 0.5396040941491015 | 0.6481523436570471 | 0.6115675363232204 |
| 0.2583611802712488 | 0.4906906507659259 | 0.8305968413941183 |
| 0.6083817168421464 | 0.6808836434924784 | 0.8221760615014134 |
| 0.1732758134254751 | 0.4622785475791596 | 0.7988356688391681 |
| 0.6467707332441764 | 0.7018057846218749 | 0.7690499764780854 |

## IM

| X                  | Y                  | Z                   |
|--------------------|--------------------|---------------------|
| 0.0852167070696956 | 0.1675147220405604 | 0.5003477764941584  |
| 0.3351095311441880 | 0.1689355002612470 | 0.50246761644481844 |
| 0.5846077160885079 | 0.1677881697167081 | 0.5016165655215680  |
| 0.8353349039647425 | 0.1677947992172431 | 0.5005207772886554  |
| 0.0864307317198974 | 0.4181309749300764 | 0.5005235881374983  |
| 0.3358856434708746 | 0.4211614198361500 | 0.5021166382161255  |
| 0.5839883731096873 | 0.4192548499649535 | 0.5012710512831107  |
| 0.8350912302771551 | 0.4181418148510140 | 0.5010739431825928  |
| 0.0852967379751312 | 0.6676793424230014 | 0.5010659819548687  |
| 0.3360166175678840 | 0.6669709499408023 | 0.5003464169643186  |
| 0.5841090581047463 | 0.6676006515696841 | 0.5003351187325382  |
| 0.8346989352002135 | 0.6678045850611332 | 0.5009372536247994  |
| 0.0856207291731220 | 0.9177835301261096 | 0.5013597960802842  |
| 0.3354075222864588 | 0.9169707509144993 | 0.5023030115325152  |
| 0.5846896191568496 | 0.9163343877487746 | 0.5002556417701074  |
| 0.8355661712068185 | 0.9180073708174148 | 0.4998733360374430  |

|                    |                    |                    |
|--------------------|--------------------|--------------------|
| 0.1674980134267532 | 0.0843346817652505 | 0.5796858337022586 |
| 0.1700395792537315 | 0.0846589030821892 | 0.4233288238457251 |
| 0.4186275190102990 | 0.0845228220623730 | 0.5802351097910756 |
| 0.4172485061449139 | 0.0841485762904428 | 0.4243378533062239 |
| 0.6686746953207271 | 0.0836332692503434 | 0.5786730620183970 |
| 0.6677540015477190 | 0.0846569778350665 | 0.4229630579789508 |
| 0.9182686524434680 | 0.0841838852268814 | 0.5784878323443163 |
| 0.9188761645688280 | 0.0849911556544819 | 0.4219121879374322 |
| 0.1676839076868254 | 0.3336271702828302 | 0.5781815457618690 |
| 0.1714735100711020 | 0.3356851602150003 | 0.4226940962534940 |
| 0.4188517894502110 | 0.3391620318105180 | 0.5803268655990139 |
| 0.4165297586083702 | 0.3354939527889378 | 0.4238369961610253 |
| 0.6681277460113614 | 0.3352957512157552 | 0.5792231001881770 |
| 0.6673338394775270 | 0.3346880489738785 | 0.4235433507061166 |
| 0.9190774422407757 | 0.3344965130677033 | 0.5786539298467188 |
| 0.9187266313349441 | 0.3350196847006970 | 0.4227477784811119 |
| 0.1695894138482572 | 0.5838780178229886 | 0.5785266047538824 |
| 0.1693905053046944 | 0.5852025445748128 | 0.4222377564515796 |
| 0.4184237137490839 | 0.5844146458320144 | 0.4235862776304192 |
| 0.6662403541227165 | 0.5853905605969457 | 0.5788701275680618 |
| 0.6680581079269227 | 0.5850909203472537 | 0.4223856195350282 |
| 0.9182047882933494 | 0.5844452365997219 | 0.5792485554131230 |
| 0.9185172158375914 | 0.5846820777020966 | 0.4229195418288099 |
| 0.1680072513755144 | 0.8337924228261685 | 0.5798788738894651 |
| 0.1696820206920538 | 0.8347652549425968 | 0.4236145998232692 |
| 0.4205771687130196 | 0.8309073112669970 | 0.5798998653535773 |
| 0.4174271587124128 | 0.8340674527583780 | 0.4226884974814968 |
| 0.6688469907708956 | 0.8343172428304174 | 0.5775420975671083 |
| 0.6681430721679404 | 0.8329786008200011 | 0.4216762469075305 |
| 0.9180770974721872 | 0.8346612927893677 | 0.5788671494452918 |
| 0.9195041531679481 | 0.8342720720285861 | 0.4226246609904195 |
| 0.4177766296308069 | 0.5994894068505610 | 0.6026688294644559 |
| 0.3065903954132245 | 0.5078954379520606 | 0.6712018522719887 |
| 0.5273875332640329 | 0.6618287077269168 | 0.6754933633305916 |
| 0.2850076058638424 | 0.4762779909250694 | 0.7833690391529770 |
| 0.5449224056919699 | 0.6483866399744455 | 0.7875193704602682 |
| 0.3448317284893872 | 0.5243927474173542 | 0.7336949442974000 |
| 0.4864426573786131 | 0.6205809727735003 | 0.7360201661925931 |

**TS2**

| <b>X</b>           | <b>Y</b>           | <b>Z</b>           |
|--------------------|--------------------|--------------------|
| 0.0852066761576040 | 0.1675447155754384 | 0.5004111172124368 |
| 0.3350988982493845 | 0.1690315460130520 | 0.5024443014634983 |
| 0.5847194149536108 | 0.1678887895647421 | 0.5016330509076141 |

|                    |                    |                    |
|--------------------|--------------------|--------------------|
| 0.8353019263763599 | 0.1678952581736013 | 0.5005421988394687 |
| 0.0857466153622966 | 0.4178739066717512 | 0.5004904179739427 |
| 0.3352620815578788 | 0.4218443778315404 | 0.5022834581316857 |
| 0.5844397450749597 | 0.4189427975888407 | 0.5014148093043076 |
| 0.8349866255708278 | 0.4180154014682955 | 0.5010829642442260 |
| 0.0851795703361234 | 0.6676739647550605 | 0.5010878965865189 |
| 0.3357578864168929 | 0.6655947333305505 | 0.5008562180557661 |
| 0.5840593398756155 | 0.6685076720931846 | 0.5005338188090036 |
| 0.8346567717671717 | 0.6678376099479095 | 0.5008913042584737 |
| 0.0855678789764553 | 0.9177765060667369 | 0.5013633227906951 |
| 0.3354562318864964 | 0.9169988553006263 | 0.5022870376184443 |
| 0.5852471353622235 | 0.9171546678827055 | 0.5003387717968479 |
| 0.8356887300511957 | 0.9181530895469904 | 0.4998234823855582 |
| 0.1675563412282841 | 0.0843452473732711 | 0.5796684689737219 |
| 0.1699810949724778 | 0.0846781902783889 | 0.4233682229803363 |
| 0.4186254056548364 | 0.0845578820435051 | 0.5802273567008243 |
| 0.4172919365773637 | 0.0842297475470914 | 0.4243972592309290 |
| 0.6687391375794504 | 0.0839090072577875 | 0.5787293308999182 |
| 0.6678308838296871 | 0.0849140268851158 | 0.4229138358992656 |
| 0.9182496045963974 | 0.0841796803780497 | 0.5784406985347132 |
| 0.9189172376608994 | 0.0851609403887039 | 0.4219536513147303 |
| 0.1677346171992795 | 0.3342445035411146 | 0.5781002970467100 |
| 0.1711718389567309 | 0.3356576079249436 | 0.4227802358934695 |
| 0.4189654152321580 | 0.3396337658275996 | 0.5802464342461917 |
| 0.4168890149611926 | 0.3356924033556794 | 0.4241391498853062 |
| 0.6682792192706940 | 0.3351476252557575 | 0.5792922823904405 |
| 0.6673973460471174 | 0.3346094934854165 | 0.4234922377214118 |
| 0.9187418163806811 | 0.3344065832349372 | 0.5787243855999051 |
| 0.9184274476435235 | 0.3348947715640236 | 0.4226735571913238 |
| 0.1694145907462925 | 0.5835706452515623 | 0.5784050611497591 |
| 0.1692688600814378 | 0.5851535131422949 | 0.4223704101056640 |
| 0.4183841330753566 | 0.5846193915199507 | 0.4234934083170998 |
| 0.6660109601421595 | 0.5854251022365276 | 0.5787823223376307 |
| 0.6678304562309663 | 0.5846889274882017 | 0.4226382480772130 |
| 0.9181248758628442 | 0.5844330003802654 | 0.5792328161470692 |
| 0.9184230298362834 | 0.5846267207681706 | 0.4229716773143934 |
| 0.1680586177944150 | 0.8337906122488689 | 0.5798590406456938 |
| 0.1696667544791453 | 0.8347971450209785 | 0.4236655169146317 |
| 0.4205947614922181 | 0.8306470453267707 | 0.5796780807293516 |
| 0.4174593579779681 | 0.8339541682394226 | 0.4230039010710981 |
| 0.6689951859894236 | 0.8345038584043181 | 0.5774489196223271 |
| 0.6683441140564526 | 0.8337743214663718 | 0.4217199738801369 |
| 0.9180188809583782 | 0.8346207755570488 | 0.5788511667398737 |
| 0.9195001700533538 | 0.8342429066108396 | 0.4226208237301634 |

|                    |                    |                    |
|--------------------|--------------------|--------------------|
| 0.4204545115807647 | 0.5963668243959219 | 0.5979949424036235 |
| 0.3044064511182658 | 0.5069011636768063 | 0.6722129028521134 |
| 0.5288505351734729 | 0.6637695720501517 | 0.6768106049767294 |
| 0.2856136971390276 | 0.4762664662493544 | 0.7862129102321002 |
| 0.5438654721059807 | 0.6467861082271094 | 0.7907163734567001 |
| 0.3337166505353311 | 0.5174258801466913 | 0.7332807026646074 |
| 0.4975725806392881 | 0.6285620474087595 | 0.7362758243345556 |

**FS**

| <b>X</b>           | <b>Y</b>           | <b>Z</b>           |
|--------------------|--------------------|--------------------|
| 0.0878609386180972 | 0.1694243292689492 | 0.4998505149637691 |
| 0.3378146461426477 | 0.1695458373770659 | 0.4997583607188612 |
| 0.5870021929119801 | 0.1680265621844308 | 0.4997593971644778 |
| 0.8372001081412370 | 0.1679266263852924 | 0.4998114372696315 |
| 0.0880654187016569 | 0.4190506242259185 | 0.4980229556302569 |
| 0.3377717050396065 | 0.4206976641567370 | 0.4946497031956497 |
| 0.5873314828915612 | 0.4191889453767231 | 0.4982761256023414 |
| 0.8372511885526572 | 0.4184492273331962 | 0.4996440905703057 |
| 0.0876839818320650 | 0.6680728216475458 | 0.4997162551005718 |
| 0.3362503631168913 | 0.6661603791672097 | 0.4951211512029230 |
| 0.5847207394258396 | 0.6659196453455168 | 0.4968959429597593 |
| 0.8369674850728215 | 0.6683605058052121 | 0.4999419520222369 |
| 0.0875837162661513 | 0.9186413644091869 | 0.5005655434326521 |
| 0.3375286105078990 | 0.9176075895667549 | 0.4997955733066021 |
| 0.5863833136413811 | 0.9162019183213116 | 0.4987091518586674 |
| 0.8368311784950119 | 0.9177094757232791 | 0.5001170763050105 |
| 0.1715349218368909 | 0.0865405280834163 | 0.5782267958489221 |
| 0.1706696996081649 | 0.0851357871963482 | 0.4222767032360770 |
| 0.4206323461527839 | 0.0850699036645191 | 0.5779994574157469 |
| 0.4201120447578400 | 0.0846674591867185 | 0.4219428720155990 |
| 0.6696588598631505 | 0.0831542409046866 | 0.5773869901350188 |
| 0.6704711678440016 | 0.0847004340095493 | 0.4216370334563952 |
| 0.9208247370766516 | 0.0852937966143567 | 0.5781570560233863 |
| 0.9206549735659224 | 0.0844093690563301 | 0.4220428565181514 |
| 0.1766006450071603 | 0.3423028622509900 | 0.5759851478212095 |
| 0.1681740037406281 | 0.3329956121110930 | 0.4191073415033813 |
| 0.4213699007252980 | 0.3425244961994524 | 0.5756707408059003 |
| 0.4210416436885294 | 0.3335735711981209 | 0.4191603080059060 |
| 0.6699725554778415 | 0.3355415391580736 | 0.5772798937180036 |
| 0.6709728779598858 | 0.3344766801342510 | 0.4212321763335355 |
| 0.9219524626138504 | 0.3357628013518780 | 0.5771663848244530 |
| 0.9192158569360170 | 0.3341697400431215 | 0.4212350560140867 |
| 0.1758814515317164 | 0.5844373249787111 | 0.5762546932841353 |
| 0.1683979823196101 | 0.5848988165695811 | 0.4190109908215550 |

|                    |                    |                    |
|--------------------|--------------------|--------------------|
| 0.4213382706518002 | 0.5856552900151847 | 0.4174786383459376 |
| 0.6658053460410424 | 0.5843749033561388 | 0.5765489587256232 |
| 0.6719730907351147 | 0.5857660216346362 | 0.4199825102825415 |
| 0.9207904046537456 | 0.5848815256367313 | 0.5780045957786271 |
| 0.9206812800554267 | 0.5854894441735597 | 0.4218109079791784 |
| 0.1712114866084402 | 0.8345433243567686 | 0.5782037078981488 |
| 0.1705609282892402 | 0.8353260102449727 | 0.4222021100338073 |
| 0.4198806920084233 | 0.8278157281671792 | 0.5760426025267098 |
| 0.4205635110680638 | 0.8360744808754389 | 0.4194300631262453 |
| 0.6655033863249186 | 0.8293500893053268 | 0.5765975546310732 |
| 0.6715774506142811 | 0.8348326117354090 | 0.4204191031114308 |
| 0.9201707029010104 | 0.8347142490667440 | 0.5784458711219441 |
| 0.9211830943020530 | 0.8353952529216214 | 0.4223428387129151 |
| 0.4096832210998810 | 0.5746829945958140 | 0.5845345884126922 |
| 0.1616992658233604 | 0.4516206736432384 | 0.7400494614094528 |
| 0.4665226697657653 | 0.6087508201984027 | 0.6884333008585017 |
| 0.3165298271711008 | 0.5352984550858653 | 0.8213067221810272 |
| 0.6585861918949580 | 0.7029978204216680 | 0.7406568953181997 |
| 0.2388229764118103 | 0.4933434370896249 | 0.7807717717282089 |
| 0.5640409565161449 | 0.6566382894701328 | 0.7141100647325934 |

### LH mechanisms:

#### IS1

| X                  | Y                  | Z                  |
|--------------------|--------------------|--------------------|
| 0.0795038635705003 | 0.1660066198498282 | 0.4985446892166816 |
| 0.3284985033605990 | 0.1662772890900720 | 0.4990622460427990 |
| 0.5788457446982470 | 0.1659571085950191 | 0.4977851739957957 |
| 0.8296564510044981 | 0.1664212604596746 | 0.4976600928915871 |
| 0.0816021771689708 | 0.4174646996628875 | 0.4990455241607067 |
| 0.3337305255101254 | 0.4211458460175742 | 0.5001129527457943 |
| 0.5773613110287107 | 0.4151673262726533 | 0.4965964551851728 |
| 0.8294616103463036 | 0.4163727310600141 | 0.4979648737234489 |
| 0.0795681571958751 | 0.6667743542320511 | 0.4989479205883116 |
| 0.3340556321382829 | 0.6657344093838694 | 0.5002869195368933 |
| 0.5798120754985603 | 0.6669277871653058 | 0.4920651000967191 |
| 0.8274120955019523 | 0.6653081765143365 | 0.4975790653927423 |
| 0.0784997585760504 | 0.9157950435781602 | 0.4987763523548348 |
| 0.3286709013338242 | 0.9152952407757103 | 0.4991141287919726 |
| 0.5779262657683303 | 0.9156695208081997 | 0.4962455546057598 |
| 0.8279664325216479 | 0.9156777967721702 | 0.4971039963339862 |
| 0.1616892404812453 | 0.0823733662072127 | 0.5771244208090410 |
| 0.1624191698970663 | 0.0825708008061973 | 0.4206782319215011 |
| 0.4131068581554165 | 0.0830886367866375 | 0.5767146728364463 |
| 0.4107934498523538 | 0.0818685856580179 | 0.4206737650857528 |

|                    |                    |                    |
|--------------------|--------------------|--------------------|
| 0.6621752606170201 | 0.0820229571615201 | 0.5751691565128573 |
| 0.6628989298619625 | 0.0840671722433938 | 0.4191775503227015 |
| 0.9109754472002365 | 0.0816193363967921 | 0.5759124612252516 |
| 0.9138789252906905 | 0.0836674258869463 | 0.4197045435260719 |
| 0.1640953040158162 | 0.3332064842921348 | 0.5761948961984256 |
| 0.1669426627116780 | 0.3350489167154145 | 0.4215934110877546 |
| 0.4142512958607751 | 0.3359535435159625 | 0.5769061440315100 |
| 0.4089622786778849 | 0.3329209297782791 | 0.4204622368023804 |
| 0.6617261875106299 | 0.3328754791516141 | 0.5753717071503691 |
| 0.6627551337304588 | 0.3321997535949659 | 0.4194666008342175 |
| 0.9127718326262093 | 0.3328353628463215 | 0.5761637916036371 |
| 0.9152044102655575 | 0.3344943619909762 | 0.4203229976777223 |
| 0.1645679284939045 | 0.5840817916169080 | 0.5764733853088225 |
| 0.1669488656952876 | 0.5853386340574528 | 0.4218178135647437 |
| 0.4110160350475613 | 0.5820618000743825 | 0.4198416892137819 |
| 0.6537258044681040 | 0.5799291567967414 | 0.5737218247550286 |
| 0.6637481686681915 | 0.5813104228257344 | 0.4167056643091789 |
| 0.9108492949701084 | 0.5825052791295938 | 0.5762739195428774 |
| 0.9136927424211074 | 0.5835065548613920 | 0.4202342320003913 |
| 0.1619815305118162 | 0.8329146986660270 | 0.5773163161789306 |
| 0.1624260650839800 | 0.8328360085957548 | 0.4208467452710586 |
| 0.4150417288237699 | 0.8316344159610339 | 0.5768520547643552 |
| 0.4090212425887525 | 0.8289574872998304 | 0.4204452033419693 |
| 0.6553020037372610 | 0.8283950431917552 | 0.5732870314472738 |
| 0.6641434730800386 | 0.8358502907836943 | 0.4164007255269309 |
| 0.9099563230341612 | 0.8317258508009928 | 0.5758464875170842 |
| 0.9124637493298094 | 0.8324065696094447 | 0.4199446935516146 |
| 0.4728933676905770 | 0.6154365306230216 | 0.6058192680630307 |
| 0.3417927393372100 | 0.5450327728583396 | 0.6552283685522692 |
| 0.2684650222682646 | 0.5065229583353815 | 0.6971027576189530 |
| 0.5545950656509701 | 0.7405921425163999 | 0.7245566147727878 |
| 0.5546109201216290 | 0.6576333041262024 | 0.6875276694100807 |

## TS1

| X                  | Y                  | Z                  |
|--------------------|--------------------|--------------------|
| 0.0792599990000014 | 0.1669899970000017 | 0.4985699949999968 |
| 0.3280600009999972 | 0.1668300030000012 | 0.4983400110000032 |
| 0.5784299970000006 | 0.1667000059999992 | 0.4974600079999972 |
| 0.8292300110000000 | 0.1670099939999972 | 0.4977700110000000 |
| 0.0815899970000018 | 0.4183700079999965 | 0.4989199939999976 |
| 0.3335399930000021 | 0.4217900040000017 | 0.4991500080000008 |
| 0.5769699809999979 | 0.4160600009999981 | 0.4961499870000025 |
| 0.8291699890000004 | 0.4171200099999979 | 0.4981600050000025 |
| 0.0794799999999967 | 0.6673399809999978 | 0.4993799920000014 |

|                    |                    |                    |
|--------------------|--------------------|--------------------|
| 0.3336899880000032 | 0.6664999719999969 | 0.4999200110000003 |
| 0.5791000130000015 | 0.6666300300000003 | 0.4916099909999970 |
| 0.8267199989999980 | 0.6660400029999991 | 0.4981200100000008 |
| 0.0778999999999997 | 0.9163500069999984 | 0.4988600020000006 |
| 0.3280400040000017 | 0.9162600040000015 | 0.4985499980000013 |
| 0.5769799950000021 | 0.9162099959999992 | 0.4960699980000028 |
| 0.8273500199999972 | 0.9158999919999999 | 0.4973199960000015 |
| 0.1618199939999982 | 0.0834499970000024 | 0.5769199730000025 |
| 0.1612699929999977 | 0.0828299969999975 | 0.4205099939999996 |
| 0.4125100079999981 | 0.0839300009999988 | 0.5762199759999973 |
| 0.4106099899999975 | 0.0826399999999978 | 0.4200499949999993 |
| 0.6613600250000005 | 0.0825499970000010 | 0.5750100019999991 |
| 0.6627500060000031 | 0.0847299989999968 | 0.4190799889999964 |
| 0.9107300040000015 | 0.0823199969999990 | 0.5759900210000026 |
| 0.9132999779999977 | 0.0840099979999991 | 0.4199300109999980 |
| 0.1652500029999971 | 0.3353700039999978 | 0.5759599800000004 |
| 0.1661400050000026 | 0.3354699909999965 | 0.4211899940000022 |
| 0.4137400090000014 | 0.3360500040000005 | 0.5758100150000018 |
| 0.4087899920000027 | 0.3335100110000013 | 0.4196499880000032 |
| 0.6609200239999993 | 0.3335199950000032 | 0.5751600270000026 |
| 0.6629400249999976 | 0.3332000079999986 | 0.4192900059999970 |
| 0.9128000139999983 | 0.3336200119999972 | 0.5762299900000016 |
| 0.9147700070000013 | 0.3351599869999973 | 0.4204500020000025 |
| 0.1657000040000014 | 0.5844900009999989 | 0.5768700240000015 |
| 0.1665000019999994 | 0.5862200259999995 | 0.4218200150000014 |
| 0.4106999930000015 | 0.5829600100000008 | 0.4191600079999985 |
| 0.6514499780000023 | 0.5803200009999969 | 0.5742700099999993 |
| 0.6640499829999982 | 0.5823600290000002 | 0.4165799920000025 |
| 0.9105399849999998 | 0.5831199880000000 | 0.5766199830000005 |
| 0.9134399889999969 | 0.5844799879999982 | 0.4207699890000000 |
| 0.1620299969999976 | 0.8339300159999965 | 0.5773100259999993 |
| 0.1611900030000015 | 0.8328700069999968 | 0.4208199979999988 |
| 0.4138599930000025 | 0.8331900239999966 | 0.5762599709999989 |
| 0.4086399970000016 | 0.8299199940000007 | 0.4200299979999967 |
| 0.6539199950000025 | 0.8279399870000006 | 0.5733199720000002 |
| 0.6635800000000032 | 0.8363500239999979 | 0.4163799880000026 |
| 0.9096800089999988 | 0.8325899840000019 | 0.5762400030000023 |
| 0.9116700289999997 | 0.8327000139999967 | 0.4202400149999973 |
| 0.4686285730389707 | 0.5957209616981500 | 0.6100822654776357 |
| 0.4121605875215322 | 0.4823568718538621 | 0.6724158267320768 |
| 0.3739422568808003 | 0.4181273418407611 | 0.7183024136874551 |
| 0.3559217237694603 | 0.6614678226537638 | 0.7112472511703992 |
| 0.4355256526514972 | 0.6865191370968650 | 0.6651725320945543 |



**IM**

| <b>X</b>           | <b>Y</b>           | <b>Z</b>           |
|--------------------|--------------------|--------------------|
| 0.0788960557287050 | 0.1684633305099693 | 0.4986169251631464 |
| 0.3274046434435171 | 0.1676693282275088 | 0.4972616833483098 |
| 0.5778040426253169 | 0.1678088219406899 | 0.4969697035578782 |
| 0.8285843393641739 | 0.1678879164856923 | 0.4979285048286284 |
| 0.0815786548354943 | 0.4197359743331381 | 0.4987299681273218 |
| 0.3332458826165117 | 0.4227652865031893 | 0.4977157849109941 |
| 0.5763810588847849 | 0.4173907582445524 | 0.4954917645512454 |
| 0.8287271192797916 | 0.4182387096421850 | 0.4984516123671730 |
| 0.0793452859275760 | 0.6681953488963889 | 0.5000295867193697 |
| 0.3331521357112108 | 0.6676506426171673 | 0.4993601288712154 |
| 0.5780278570883123 | 0.6661893325749773 | 0.4909309899726853 |
| 0.8256826772067939 | 0.6671318570045740 | 0.4989234416831798 |
| 0.0769944681996739 | 0.9171717272653007 | 0.4989856212710044 |
| 0.3270853896202834 | 0.9177061376748931 | 0.4977035821043546 |
| 0.5755646118027224 | 0.9170157245417628 | 0.4958017540678525 |
| 0.8264158853931739 | 0.9162438438857755 | 0.4976451243557607 |
| 0.1620149998338270 | 0.0850691828523119 | 0.5766044493457533 |
| 0.1595548252688172 | 0.0832143999363179 | 0.4202625753434238 |
| 0.4116188547960081 | 0.0851784127710091 | 0.5754725159537469 |
| 0.4103236471419395 | 0.0837927955840130 | 0.4191045678217699 |
| 0.6601459593976887 | 0.0833531519143998 | 0.5747791707158304 |
| 0.6625166368157407 | 0.0857183590326560 | 0.4189258829851991 |
| 0.9103626910592095 | 0.0833609877682775 | 0.5761037106694192 |
| 0.9124194738848049 | 0.0845112559745440 | 0.4202717717141280 |
| 0.1669745415158043 | 0.3386219873377788 | 0.5756122155261615 |
| 0.1649267629218879 | 0.3361029481386061 | 0.4205884660179743 |
| 0.4129788795536060 | 0.3362033194840985 | 0.5741729211091999 |
| 0.4085443039666630 | 0.3343865233960082 | 0.4184400016790631 |
| 0.6597142388323214 | 0.3344933735940712 | 0.5748502082080245 |
| 0.6632044883386871 | 0.3346930223953643 | 0.4190373266277520 |
| 0.9128347145660345 | 0.3347977666546292 | 0.5763246425566003 |
| 0.9141111275852154 | 0.3361715594532794 | 0.4206394272659567 |
| 0.1674029121458569 | 0.5850939109129051 | 0.5774597999314202 |
| 0.1658228712133213 | 0.5875378964248680 | 0.4218245723767489 |
| 0.4102392858446497 | 0.5843160483246970 | 0.4181401795955100 |
| 0.6480278998579326 | 0.5808996528257998 | 0.5750842123209570 |
| 0.6645005636915786 | 0.5839246636357031 | 0.4163915521709866 |
| 0.9100794279722210 | 0.5840497129194635 | 0.5771504722978777 |
| 0.9130647201962601 | 0.5859525428804181 | 0.4215636566526147 |
| 0.1621068356730356 | 0.8354506277052511 | 0.5772903584698922 |
| 0.1593458533045552 | 0.8329118471867444 | 0.4207827487454639 |
| 0.4120805786271521 | 0.8355130199370235 | 0.5753624886243540 |

|                    |                    |                    |
|--------------------|--------------------|--------------------|
| 0.4080603474247141 | 0.8313541121988431 | 0.4194206488350670 |
| 0.6518476215222133 | 0.8272462468696463 | 0.5733628817965727 |
| 0.6627361595711433 | 0.8370894627485886 | 0.4163465004190192 |
| 0.9092598281835352 | 0.8338851060318490 | 0.5768378358619922 |
| 0.9104784828892732 | 0.8331443209436887 | 0.4206859201120309 |
| 0.4845667131372948 | 0.6315238174363643 | 0.6095926666784445 |
| 0.3858302848198095 | 0.5170225760103555 | 0.6792637490194572 |
| 0.3410596526062751 | 0.4099542406846440 | 0.6927192449775617 |
| 0.3850161737023459 | 0.5979343378403372 | 0.7223728143633156 |
| 0.4673373914105342 | 0.7086820278476698 | 0.6793916543106007 |

## TS2

| X                  | Y                  | Z                  |
|--------------------|--------------------|--------------------|
| 0.0795795852682062 | 0.1691475675745195 | 0.4977636283952548 |
| 0.3284718362721577 | 0.1686743255077658 | 0.4969902802228744 |
| 0.5786410317258586 | 0.1685963374362700 | 0.4967539481657396 |
| 0.8293478545014779 | 0.1686793277338197 | 0.4973579826268235 |
| 0.0820363563256876 | 0.4203029155806703 | 0.4979603680759012 |
| 0.3329444831811088 | 0.4222041108230314 | 0.4961769967472164 |
| 0.5773694855345468 | 0.4185552350910058 | 0.4951748648191553 |
| 0.8295208764464306 | 0.4190872529393274 | 0.4979701291788955 |
| 0.0803077825040788 | 0.6689303399934801 | 0.4994992534572091 |
| 0.3338069749403019 | 0.6677185116521969 | 0.4989001799893912 |
| 0.5792965370859946 | 0.6674807129069364 | 0.4908322448637818 |
| 0.8269377137851421 | 0.6680797909871359 | 0.4983772422672387 |
| 0.0782009958120469 | 0.9180512680239303 | 0.4984891360234229 |
| 0.3282125523954776 | 0.9182671417052930 | 0.4976045991317476 |
| 0.5767955411438592 | 0.9176921202425987 | 0.4956222700892354 |
| 0.8276632294513034 | 0.9174225095731926 | 0.4970046082811663 |
| 0.1627511287147670 | 0.0860005478551642 | 0.5760206954734741 |
| 0.1609201905065021 | 0.0840521668540219 | 0.4197583719949307 |
| 0.4125359777927571 | 0.0860135859606288 | 0.5752692506837107 |
| 0.4111795216568126 | 0.0843442821690701 | 0.4189802531774233 |
| 0.6612152807827627 | 0.0841763739577104 | 0.5744687428237256 |
| 0.6629711187971096 | 0.0862573254239223 | 0.4186132471603727 |
| 0.9114842326743400 | 0.0843943802506288 | 0.5754553474296600 |
| 0.9130389970860974 | 0.0853573986031790 | 0.4195190522499672 |
| 0.1674555894992266 | 0.3390731638919320 | 0.5747162663244367 |
| 0.1644307412206487 | 0.3362768513535173 | 0.4193130043128121 |
| 0.4136838042104998 | 0.3382618554602175 | 0.5739325190656857 |
| 0.4099419892474216 | 0.3346199975393489 | 0.4176817522351825 |
| 0.6606745664093197 | 0.3355434250289520 | 0.5745007290476991 |
| 0.6638107985659190 | 0.3354377086622691 | 0.4187532185097495 |
| 0.9136273344325474 | 0.3355732471085418 | 0.5757180134624491 |

|                    |                    |                    |
|--------------------|--------------------|--------------------|
| 0.9144330238079661 | 0.3368438191387426 | 0.4199970479907051 |
| 0.1678553056205061 | 0.5854654854889532 | 0.5768370404769669 |
| 0.1667260275065559 | 0.5882802743451947 | 0.4212204363830522 |
| 0.4114620254226153 | 0.5851651322552271 | 0.4175307590906740 |
| 0.6500241408278099 | 0.5822499362760922 | 0.5747283586743208 |
| 0.6654449978142267 | 0.5850360359521005 | 0.4161156009148285 |
| 0.9111612028849193 | 0.5849423130963842 | 0.5766501195894236 |
| 0.9140515668702349 | 0.5867509249733587 | 0.4210023573903285 |
| 0.1629741389855610 | 0.8360747866272646 | 0.5769291706911233 |
| 0.1608125772124324 | 0.8338636106330809 | 0.4204377340632205 |
| 0.4131266021163072 | 0.8353837736639562 | 0.5751370617498281 |
| 0.4090476099521183 | 0.8318665887908097 | 0.4192790685037195 |
| 0.6542401125985293 | 0.8288652511891428 | 0.5729439892414021 |
| 0.6636962446636900 | 0.8380175191172938 | 0.4159638883692338 |
| 0.9104164097354613 | 0.8349234312324825 | 0.5762352832438040 |
| 0.9117908434155950 | 0.8341045788924575 | 0.4201211265222539 |
| 0.4696634039384910 | 0.6193343351448266 | 0.6067768944739573 |
| 0.3795509143325323 | 0.5045412912704379 | 0.6836649772471982 |
| 0.3545801892681117 | 0.4009227867719001 | 0.6959661579209213 |
| 0.3610198778609853 | 0.5758746198689380 | 0.7232222446469873 |
| 0.4357377958865868 | 0.6918214710528940 | 0.6673771615895417 |

## FS1

| X                  | Y                  | Z                  |
|--------------------|--------------------|--------------------|
| 0.0823137034262155 | 0.1718845158327356 | 0.4943504413236883 |
| 0.3327406075867301 | 0.1726943146287826 | 0.4959046677211296 |
| 0.5819889881280260 | 0.1717463994185912 | 0.4958909265971889 |
| 0.8324019150507023 | 0.1718449727263283 | 0.4950758938196155 |
| 0.0838671622864666 | 0.4225706805708123 | 0.4948819678702105 |
| 0.3317388854395002 | 0.4199594081023968 | 0.4900218440921106 |
| 0.5813231921335849 | 0.4232131424768066 | 0.4939072658908125 |
| 0.8326959051129790 | 0.4224814261278957 | 0.4960441964257789 |
| 0.0841577688100926 | 0.6718703043818487 | 0.4973779204085806 |
| 0.3364263318566742 | 0.6679899877923042 | 0.4970603844620936 |
| 0.5843712570767111 | 0.6726462342347871 | 0.4904372644281798 |
| 0.8319578600985474 | 0.6718715269174013 | 0.4961924446034861 |
| 0.0830271062615507 | 0.9215694310584477 | 0.4965031950330840 |
| 0.3327212034962714 | 0.9205111578269036 | 0.4972086672413379 |
| 0.5817192585084082 | 0.9203977030459495 | 0.4949043341747582 |
| 0.8326526056838276 | 0.9221371723228600 | 0.4944425439827768 |
| 0.1656956442385094 | 0.0897260078665777 | 0.5736856799843635 |
| 0.1663816514572569 | 0.0874032345248266 | 0.4177415586009651 |
| 0.4162044697797427 | 0.0893542787191164 | 0.5744561896035687 |
| 0.4146030197163099 | 0.0865502285093031 | 0.4184829946000507 |

|                    |                    |                    |
|--------------------|--------------------|--------------------|
| 0.6654925663230508 | 0.0874692621309380 | 0.5732270312552965 |
| 0.6647890467225958 | 0.0884131909889748 | 0.4173627038610586 |
| 0.9159703991348533 | 0.0885279501800510 | 0.5728618944706071 |
| 0.9155170898912656 | 0.0887419691177279 | 0.4165081743933356 |
| 0.1693797814329283 | 0.3408778701085492 | 0.5711324695175345 |
| 0.1624466544156866 | 0.3369724642131784 | 0.4142111574921477 |
| 0.4165035028380860 | 0.3464959993646863 | 0.5729709108916397 |
| 0.4155327303704713 | 0.3355538941127030 | 0.4146487544596646 |
| 0.6645158767172999 | 0.3397436307684711 | 0.5731028124064049 |
| 0.6662360394748402 | 0.3384164537299008 | 0.4176167860377480 |
| 0.9167978138985841 | 0.3386751689241834 | 0.5732914970858297 |
| 0.9157206086989534 | 0.3395328578806116 | 0.4174275308896915 |
| 0.1696648795191208 | 0.5869517837931292 | 0.5743460026591677 |
| 0.1703386526794921 | 0.5912497860264964 | 0.4188038924082527 |
| 0.4163529837344957 | 0.5885614679773562 | 0.4150930770713321 |
| 0.6580091047073134 | 0.5876510700772464 | 0.5733049440877749 |
| 0.6692227343048363 | 0.5894815252176833 | 0.4150117958902117 |
| 0.9154883025357020 | 0.5885127138040598 | 0.5746487087556046 |
| 0.9179989535661359 | 0.5899444533451182 | 0.4187571603412004 |
| 0.1664433522356587 | 0.8385714223153212 | 0.5754844195760541 |
| 0.1666794728439490 | 0.8376706644184402 | 0.4190576753342538 |
| 0.4173106960729361 | 0.8348667885716942 | 0.5742353542517400 |
| 0.4129966600617337 | 0.8339164951586713 | 0.4187127471783258 |
| 0.6638100769037877 | 0.8353412684671382 | 0.5712684190207045 |
| 0.6675365850338839 | 0.8417297445921170 | 0.4144334401700963 |
| 0.9150427359431718 | 0.8390767320350220 | 0.5738250727710478 |
| 0.9170402855208701 | 0.8379456106875193 | 0.4178619521631635 |
| 0.4390405216750259 | 0.5658550040801890 | 0.5872104028272497 |
| 0.3167740153921771 | 0.4614360298809057 | 0.7641560940757659 |
| 0.3294126770178060 | 0.3885250334474336 | 0.7341465434171918 |
| 0.3030308421172091 | 0.5318610400002818 | 0.7956632255146616 |
| 0.3982557400679911 | 0.6176985904995276 | 0.6513368958614755 |

**TER mechanisms:**

**IS1**

| <b>X</b>           | <b>Y</b>           | <b>Z</b>           |
|--------------------|--------------------|--------------------|
| 0.0846041114024064 | 0.1692624473097534 | 0.4935452571198098 |
| 0.3354094147013065 | 0.1720503981748264 | 0.4971477652032254 |
| 0.5847475120210948 | 0.1708717860846023 | 0.4967557926560872 |
| 0.8351099667459546 | 0.1707310227473572 | 0.4947611902083191 |
| 0.0858334554260429 | 0.4207061659502239 | 0.4954750362223083 |
| 0.3358889991654591 | 0.4218249804951744 | 0.4932569128919556 |
| 0.5837106372346946 | 0.4222917292202513 | 0.4955222938692743 |
| 0.8350822550091767 | 0.4211950539685298 | 0.4965717146243158 |

|                    |                    |                    |
|--------------------|--------------------|--------------------|
| 0.0866243794743005 | 0.6705166063591601 | 0.4980962902688734 |
| 0.3394728848212665 | 0.6664530607183731 | 0.4989527093140428 |
| 0.5843022584958352 | 0.6702226365226155 | 0.4929428600207214 |
| 0.8342462997853708 | 0.6707143172208865 | 0.4967207778362723 |
| 0.0861707970474183 | 0.9199651678543932 | 0.4966612543331889 |
| 0.3355703425402842 | 0.9191107253278992 | 0.4984130197652615 |
| 0.5851162084758896 | 0.9198812920323333 | 0.4954383276692681 |
| 0.8366914650599611 | 0.9213975236542326 | 0.4934305369659128 |
| 0.1674220732245492 | 0.0878909421054835 | 0.5738774348481355 |
| 0.1706204930070732 | 0.0858773838815333 | 0.4178081569283293 |
| 0.4189959430752304 | 0.0883916900999645 | 0.5754428677234464 |
| 0.4169769188426219 | 0.0854924380024395 | 0.4197633099109176 |
| 0.6692687242530501 | 0.0870606293577130 | 0.5736206602550252 |
| 0.6667238578023542 | 0.0874107394061999 | 0.4176313310167011 |
| 0.9188221467459582 | 0.0870831676334294 | 0.5721408850007762 |
| 0.9182068716286391 | 0.0879275697949683 | 0.4154190523999897 |
| 0.1680459923597568 | 0.3352406080897767 | 0.5706259128875686 |
| 0.1680804646735759 | 0.3373591906318881 | 0.4156373616181332 |
| 0.4193374245920027 | 0.3469698186901873 | 0.5748220268764997 |
| 0.4176355872517711 | 0.3361858374545363 | 0.4169528786979106 |
| 0.6676536998300611 | 0.3386859946538890 | 0.5741246636331737 |
| 0.6679971544386285 | 0.3377159495845603 | 0.4185995692944472 |
| 0.9185885392020338 | 0.3365564809588570 | 0.5735789039064209 |
| 0.9185768611744416 | 0.3390651407817922 | 0.4175124927616353 |
| 0.1710896073090974 | 0.5845193445061597 | 0.5752005829316218 |
| 0.1737845811161121 | 0.5902986500313655 | 0.4199749805533037 |
| 0.4184039441814472 | 0.5872989840833720 | 0.4171424399681448 |
| 0.6601950586993289 | 0.5870337070961364 | 0.5743413448640710 |
| 0.6697880351223301 | 0.5882249457347786 | 0.4167100202168074 |
| 0.9175630268729744 | 0.5870834292655175 | 0.5751745282636318 |
| 0.9203140016149779 | 0.5887736922306421 | 0.4194039612784106 |
| 0.1686975736587562 | 0.8370343420545674 | 0.5761602665318498 |
| 0.1703399121576280 | 0.8360102803993463 | 0.4197367366069839 |
| 0.4216253600467137 | 0.8338182356134070 | 0.5755548652751763 |
| 0.4155404419868838 | 0.8319667237084315 | 0.4200721484612476 |
| 0.6704817416337320 | 0.8377475521103519 | 0.5704397060872510 |
| 0.6687359649457504 | 0.8380162248302366 | 0.4154312590976211 |
| 0.9180673685685917 | 0.8385313832400840 | 0.5737061819706383 |
| 0.9204795672630715 | 0.8358382175372185 | 0.4176303755088628 |
| 0.4413177311257672 | 0.5651243785767179 | 0.6034917138363740 |
| 0.3235843534679643 | 0.5028827478359428 | 0.6634897908497438 |
| 0.5151714960140155 | 0.6760003364117535 | 0.6665173999925654 |
| 0.2586317745669459 | 0.4749807244098433 | 0.7093428990636398 |
| 0.5515568192765444 | 0.7378937113264060 | 0.7135658927974957 |

|                    |                    |                    |
|--------------------|--------------------|--------------------|
| 0.3431157080726964 | 0.5225198045954169 | 0.8642066306813828 |
| 0.4475822777904633 | 0.5700940576344770 | 0.8416969904352273 |

**TS1**

| <b>X</b>           | <b>Y</b>           | <b>Z</b>           |
|--------------------|--------------------|--------------------|
| 0.0752517970834816 | 0.1634606774562570 | 0.4957671604284996 |
| 0.3243532030541090 | 0.1637705710319466 | 0.4959019186658224 |
| 0.5744019426095122 | 0.1630096376216272 | 0.4948900764544248 |
| 0.8250243387140515 | 0.1630017241470938 | 0.4949818120016828 |
| 0.0779120511658178 | 0.4148463068723984 | 0.4946033343191800 |
| 0.3281730265980798 | 0.4178790381002244 | 0.4948703283273019 |
| 0.5721950763054622 | 0.4121853243911602 | 0.4934057318432607 |
| 0.8250583443206239 | 0.4137741836621771 | 0.4948155870067978 |
| 0.0753693530220544 | 0.6638082467528008 | 0.4955610746321994 |
| 0.3283487343792900 | 0.6622088560571910 | 0.4951172441128548 |
| 0.5723064410990375 | 0.6617676242187542 | 0.4913491393513496 |
| 0.8226244902078932 | 0.6630429525825008 | 0.4960810506855537 |
| 0.0743145332434593 | 0.9130827563058190 | 0.4962452720422021 |
| 0.3242467002937274 | 0.9125375245146542 | 0.4959815912877303 |
| 0.5720585996035439 | 0.9116070260287827 | 0.4935310997421140 |
| 0.8225016579474485 | 0.9112236330178547 | 0.4959451012646027 |
| 0.1579753217511666 | 0.0802194583575400 | 0.5743664326843998 |
| 0.1579151445671911 | 0.0796360192478360 | 0.4179580573591437 |
| 0.4085494786978714 | 0.0802934112824403 | 0.5738713625678926 |
| 0.4067322063697177 | 0.0793216667095464 | 0.4176822571189404 |
| 0.6574637630158122 | 0.0787996611636430 | 0.5723495764141049 |
| 0.6582247334673568 | 0.0803896607387955 | 0.4164069538248824 |
| 0.9070122591277610 | 0.0791844268671014 | 0.5737165713187125 |
| 0.9083605481077727 | 0.0788103112145606 | 0.4177046839091644 |
| 0.1621255865576430 | 0.3332823737522048 | 0.5722877622717988 |
| 0.1614984946192521 | 0.3304415768271056 | 0.4170434606495731 |
| 0.4089354323061372 | 0.3342102345054911 | 0.5729407351135976 |
| 0.4049971633865965 | 0.3294519587919851 | 0.4163125003572432 |
| 0.6574381850193234 | 0.3303908632582377 | 0.5721898987900573 |
| 0.6581162778213780 | 0.3291832024989034 | 0.4162256175241907 |
| 0.9098110856754857 | 0.3309091512288589 | 0.5725729928815397 |
| 0.9095848885738462 | 0.3305794541548081 | 0.4170216285226686 |
| 0.1615441919122631 | 0.5807832856074953 | 0.5720503350327277 |
| 0.1619770580735036 | 0.5830188703900134 | 0.4171373473465607 |
| 0.4076933015065407 | 0.5797227380464847 | 0.4156877126485554 |
| 0.6454004115886391 | 0.5745579722358443 | 0.5723645735301375 |
| 0.6589470138469125 | 0.5800884886986211 | 0.4151581189556168 |
| 0.9073927136024408 | 0.5795577241319663 | 0.5735752949676254 |
| 0.9084542596226867 | 0.5815464566620960 | 0.4176622436971086 |

|                    |                    |                    |
|--------------------|--------------------|--------------------|
| 0.1577904359261665 | 0.8293666172950793 | 0.5744028859565873 |
| 0.1580046698883635 | 0.8303941533473136 | 0.4178498296774080 |
| 0.4088567084575843 | 0.8269299473503509 | 0.5732064115436231 |
| 0.4049039664046460 | 0.8272468433242465 | 0.4165421940462934 |
| 0.6452884172352213 | 0.8222686080570938 | 0.5721227346336164 |
| 0.6582977679309536 | 0.8297486681795546 | 0.4151645181193472 |
| 0.9068483062815886 | 0.8293384103159197 | 0.5742992412673402 |
| 0.9075288703035085 | 0.8296146790599508 | 0.4181199786720028 |
| 0.5050743078101405 | 0.6300477730477496 | 0.6200075564943717 |
| 0.3694471957314635 | 0.5620766387150330 | 0.6658734875129878 |
| 0.6066677854841526 | 0.6831067842654416 | 0.6961345629449663 |
| 0.2678945582375281 | 0.5089058877796699 | 0.6831287311976885 |
| 0.7152910580437912 | 0.7328989045048545 | 0.6986512165382338 |
| 0.4370272390943062 | 0.6157356760731874 | 0.7767077960264929 |
| 0.5543674691328822 | 0.6682523354555014 | 0.7709482178058397 |

## IM

| X                  | Y                  | Z                  |
|--------------------|--------------------|--------------------|
| 0.0725146415406280 | 0.1621372064024183 | 0.4959784926230266 |
| 0.3212561597121885 | 0.1620645339081065 | 0.4958236981770715 |
| 0.5711186577819295 | 0.1609014711166633 | 0.4942736845490279 |
| 0.8217169333725132 | 0.1608282095379326 | 0.4949813591356236 |
| 0.0748474440516568 | 0.4130442023915989 | 0.4941712250172048 |
| 0.3255394328844146 | 0.4165319389543887 | 0.4936760213103839 |
| 0.5693206655921055 | 0.4106022415205831 | 0.4922284737629039 |
| 0.8220145554616638 | 0.4117841720518587 | 0.4940697110599625 |
| 0.0723598496695239 | 0.6616013362246387 | 0.4946654913107920 |
| 0.3245812935518467 | 0.6595782321503432 | 0.4935223413190754 |
| 0.5704317363128905 | 0.6590412274223323 | 0.4898614259174017 |
| 0.8213393844209321 | 0.6617724858357794 | 0.4945800597074759 |
| 0.0713362654069317 | 0.9114184971733467 | 0.4960086150764056 |
| 0.3210129803788297 | 0.9105516413021719 | 0.4953919215816078 |
| 0.5684410141439799 | 0.9089771684731766 | 0.4934477150842501 |
| 0.8201365422008732 | 0.9091449353354367 | 0.4961307034826253 |
| 0.1552627114975853 | 0.0784620609242703 | 0.5744179811504672 |
| 0.1545474962601493 | 0.0780538066967614 | 0.4179849213157686 |
| 0.4056601844083905 | 0.0782390588284759 | 0.5734479860130357 |
| 0.4031541460815777 | 0.0774696158790947 | 0.4172229054912533 |
| 0.6536137732582349 | 0.0765310078452763 | 0.5720752462890805 |
| 0.6552310931561656 | 0.0779125997273753 | 0.4162304265514499 |
| 0.9043994020546973 | 0.0776590313944878 | 0.5738355182136337 |
| 0.9052994084882523 | 0.0766825039014558 | 0.4180280521658333 |
| 0.1608065512885251 | 0.3336979263782262 | 0.5723416162499797 |
| 0.1578463904768779 | 0.3281744348033465 | 0.4166117923721432 |

|                    |                    |                    |
|--------------------|--------------------|--------------------|
| 0.4068248264956814 | 0.3341849204958471 | 0.5726522333386511 |
| 0.4013743553210557 | 0.3270555935421967 | 0.4157878049660198 |
| 0.6540544778452172 | 0.3285443944221721 | 0.5712878182783064 |
| 0.6552225968537789 | 0.3271169224831854 | 0.4154950375428987 |
| 0.9066587391498491 | 0.3293062186450633 | 0.5721807798466318 |
| 0.9062691896465698 | 0.3279043614863739 | 0.4165307745066676 |
| 0.1593007159976802 | 0.5789326538568496 | 0.5715369497721074 |
| 0.1580042990233492 | 0.5801981668736895 | 0.4159426306675451 |
| 0.4054255114600596 | 0.5780217377170892 | 0.4144537036193249 |
| 0.6483642696490185 | 0.5737912777294913 | 0.5706657006993978 |
| 0.6566772096205213 | 0.5781861514078600 | 0.4137637474336305 |
| 0.9047749984534043 | 0.5776519750190989 | 0.5726084121618860 |
| 0.9058245372165209 | 0.5789295510841277 | 0.4162752380722213 |
| 0.1548517818471755 | 0.8272394923667485 | 0.5738032093816660 |
| 0.1546773469279790 | 0.8288039849046492 | 0.4173411119442000 |
| 0.4044801015219594 | 0.8235253957882085 | 0.5724879519861137 |
| 0.4020273135904501 | 0.8256089023503739 | 0.4159126299923994 |
| 0.6426085432291323 | 0.8190499061954446 | 0.5715027907488659 |
| 0.6562846172993609 | 0.8288589773252817 | 0.4149818321108368 |
| 0.9044239016176027 | 0.8268536386041657 | 0.5740580945260688 |
| 0.9049735119926176 | 0.8289702443082319 | 0.4175281545115697 |
| 0.5182363758656280 | 0.6278265753596574 | 0.6197169084895334 |
| 0.4000988389760898 | 0.6008728594247035 | 0.6851353438691568 |
| 0.6204545736226872 | 0.6842845773419211 | 0.6968641971464512 |
| 0.2902337922318404 | 0.5403537801521044 | 0.6772465099039494 |
| 0.7289268131139579 | 0.7195220838947923 | 0.6990692707728822 |
| 0.4378272628484717 | 0.6441104297637738 | 0.7492160161360144 |
| 0.5702808811289802 | 0.6982937052773399 | 0.7551876646474966 |

## TS2

| X                  | Y                  | Z                  |
|--------------------|--------------------|--------------------|
| 0.0721600422081679 | 0.1618608837592177 | 0.4957825242091615 |
| 0.3211272804949488 | 0.1621184109425542 | 0.4957790397307064 |
| 0.5710458110556473 | 0.1609190630852240 | 0.4942150545801382 |
| 0.8216593506785657 | 0.1608486230037016 | 0.4949031384085529 |
| 0.0745550910431163 | 0.4129260158850911 | 0.4939630041298101 |
| 0.3250069265240469 | 0.4162588462506847 | 0.4933845247609553 |
| 0.5691428098851503 | 0.4106442445814764 | 0.4924112368532576 |
| 0.8218748393549120 | 0.4117880996122309 | 0.4939139955901694 |
| 0.0720608613442693 | 0.6616792162996035 | 0.4944476050983368 |
| 0.3242654733012316 | 0.6596388345241522 | 0.4930501207887942 |
| 0.5692386086852466 | 0.6591322037623399 | 0.4896739287589824 |
| 0.8211027912208095 | 0.6617391680990820 | 0.4946105521025430 |
| 0.0713776631778344 | 0.9114978117805776 | 0.4957993042982735 |



|                    |                    |                    |
|--------------------|--------------------|--------------------|
| 0.3209884359965756 | 0.9104834506557467 | 0.4953781421542444 |
| 0.5685788812542825 | 0.9086259954175731 | 0.4934901735084906 |
| 0.8203682531652987 | 0.9095082580484544 | 0.4959873421622376 |
| 0.1550840847234696 | 0.0784329543449616 | 0.5743100820466367 |
| 0.1545862481803653 | 0.0781561536591582 | 0.4178579683631653 |
| 0.4056091880921358 | 0.0783036852331023 | 0.5733583929658863 |
| 0.4030500795420195 | 0.0775065420375753 | 0.4172174079755919 |
| 0.6535135439651611 | 0.0764496065363076 | 0.5720026782130319 |
| 0.6550493168977168 | 0.0777360872561133 | 0.4162469023578907 |
| 0.9043951391889707 | 0.0778358736839166 | 0.5738349005948749 |
| 0.9051769357140387 | 0.0768132617523918 | 0.4178305762848850 |
| 0.1600093474856053 | 0.3329711623465386 | 0.5720081236494750 |
| 0.1574983524418201 | 0.3279682680941605 | 0.4163997202859448 |
| 0.4064154006547653 | 0.3341629524960936 | 0.5725244737946724 |
| 0.4011713869307485 | 0.3270212194238979 | 0.4157379317416243 |
| 0.6540931414442781 | 0.3285503314729041 | 0.5712582904097800 |
| 0.6549919816713938 | 0.3271494570899236 | 0.4154319449115462 |
| 0.9065546848827636 | 0.3293907787246724 | 0.5720569926326107 |
| 0.9060421656684241 | 0.3278357809245449 | 0.4163860014574538 |
| 0.1589471183953322 | 0.5790030939881348 | 0.5712016918947285 |
| 0.1574992801604580 | 0.5800810959171230 | 0.4156723370183144 |
| 0.4047285446591929 | 0.5777159332483848 | 0.4140717186131865 |
| 0.6473023934307207 | 0.5745806836661060 | 0.5704723348914129 |
| 0.6562399843378870 | 0.5781854995882938 | 0.4139152367540859 |
| 0.9046328437300346 | 0.5776029495027899 | 0.5724864353218422 |
| 0.9055702117921881 | 0.5789758140226198 | 0.4161610630883387 |
| 0.1546866564564056 | 0.8272051399826381 | 0.5736764174049682 |
| 0.1548187986748317 | 0.8290102576818228 | 0.4171847798878260 |
| 0.4044779488513370 | 0.8230243713081861 | 0.5724614169412376 |
| 0.4019200132358804 | 0.8256808489607791 | 0.4157737151253044 |
| 0.6441893689972459 | 0.8196551309731319 | 0.5714551422901479 |
| 0.6562382139799112 | 0.8287973146207576 | 0.4149620031673180 |
| 0.9045391737143333 | 0.8269379908168659 | 0.5737443971633525 |
| 0.9049010237640758 | 0.8289303635774345 | 0.4174118892858373 |
| 0.5261582636476796 | 0.6366131411552779 | 0.6228435979274736 |
| 0.4093618043650713 | 0.6046631733853689 | 0.6910155429468328 |
| 0.6333388712468855 | 0.6948974730772992 | 0.7002858607738567 |
| 0.3052592894445422 | 0.5369753497384759 | 0.6693519205186549 |
| 0.7419046262859490 | 0.7246431471957435 | 0.6953816021158329 |
| 0.4319607217684334 | 0.6442655147397901 | 0.7519009947227202 |
| 0.5964578133640226 | 0.7130828856267498 | 0.7581548461857143 |

FS

X

Y

Z

|                    |                    |                    |
|--------------------|--------------------|--------------------|
| 0.0722220489636331 | 0.1607433490372293 | 0.4966642487640897 |
| 0.3218907648395578 | 0.1606464751682063 | 0.4966090290986964 |
| 0.5715474306047328 | 0.1598138435331488 | 0.4966328561752195 |
| 0.8217626339335192 | 0.1598993125184378 | 0.4968004651925096 |
| 0.0734752066635422 | 0.4109187354397921 | 0.4959367805895545 |
| 0.3236834066156961 | 0.4112421945216733 | 0.4927228787596381 |
| 0.5707664367517400 | 0.4098875003264281 | 0.4950415831126699 |
| 0.8219537874134855 | 0.4103710217233481 | 0.4968640738012681 |
| 0.0720836131675834 | 0.6602113413734413 | 0.4969964121591203 |
| 0.3237024896657550 | 0.6597743422814425 | 0.4939911384313836 |
| 0.5693065044041565 | 0.6584093586240333 | 0.4918830391552079 |
| 0.8205285131020924 | 0.6595998422313184 | 0.4968672125059265 |
| 0.0715738901973680 | 0.9100725000302093 | 0.4973160559964910 |
| 0.3217441484799767 | 0.9094829941495648 | 0.4969788047525210 |
| 0.5706358805384577 | 0.9089406614962188 | 0.4953996614860575 |
| 0.8205109433529429 | 0.9093846858642503 | 0.4966410432473864 |
| 0.1555961138715667 | 0.0776968306685359 | 0.5750128965025681 |
| 0.1546243014197518 | 0.0762644556200701 | 0.4189711076059892 |
| 0.4052637725198769 | 0.0770870977036807 | 0.5749180424520917 |
| 0.4043705742496560 | 0.0759928305443092 | 0.4188256491743753 |
| 0.6543852530130057 | 0.0754578849899013 | 0.5743433001737861 |
| 0.6552873694755306 | 0.0772067514022281 | 0.4182568952872806 |
| 0.9050779666044572 | 0.0766843760726169 | 0.5749250515727651 |
| 0.9050267232975125 | 0.0764646510787890 | 0.4188656611042717 |
| 0.1612443848590922 | 0.3319532540249374 | 0.5732653783868147 |
| 0.1541231224902587 | 0.3257700931215240 | 0.4166837512320538 |
| 0.4054689209888610 | 0.3320754605855395 | 0.5734106121556363 |
| 0.4047301415133450 | 0.3249614954761493 | 0.4161141448451022 |
| 0.6543594023977520 | 0.3272784616605188 | 0.5742471023772553 |
| 0.6557153920101447 | 0.3260518846180505 | 0.4182453309816787 |
| 0.9064675616524257 | 0.3274568235280499 | 0.5745674662656344 |
| 0.9051472733672232 | 0.3267360517539079 | 0.4187943049389515 |
| 0.1598729020595881 | 0.5772922630806845 | 0.5735751747160055 |
| 0.1547409640266883 | 0.5772755375155749 | 0.4174518965985961 |
| 0.4044114914552622 | 0.5766981923031745 | 0.4148670127288959 |
| 0.6475128437990302 | 0.5752479942014969 | 0.5729737967189019 |
| 0.6566839946031253 | 0.5763791923578151 | 0.4161260027040193 |
| 0.9048240618716479 | 0.5769721484943857 | 0.5751231911252599 |
| 0.9052801553662075 | 0.5772207571243190 | 0.4190652028207850 |
| 0.1554073177923745 | 0.8267586876210379 | 0.5752902138122538 |
| 0.1549074622504229 | 0.8268555400793040 | 0.4191958549998902 |
| 0.4054700206219943 | 0.8220195741356583 | 0.5738618355898664 |
| 0.4040400335417419 | 0.8268811125457913 | 0.4169910642736019 |
| 0.6479925350654276 | 0.8203341564124570 | 0.5728264871926991 |

|                    |                    |                    |
|--------------------|--------------------|--------------------|
| 0.6562430853763644 | 0.8284091253710012 | 0.4161479162262810 |
| 0.9041304044951349 | 0.8265947053883671 | 0.5750017692140553 |
| 0.9048174862327492 | 0.8265114006535588 | 0.4191680653323925 |
| 0.4155608467042108 | 0.5778373233174730 | 0.5820384218450693 |
| 0.3229959212174459 | 0.6269546878773845 | 0.7138203914232257 |
| 0.7075367589713938 | 0.6955120495407194 | 0.7350934250938416 |
| 0.3589224210166111 | 0.5701461247081747 | 0.6841377814997809 |
| 0.7999340106198629 | 0.6951447711188881 | 0.7331755330450774 |
| 0.2878369018721804 | 0.6819207236831415 | 0.7441231565747146 |
| 0.6149425016157999 | 0.6960074783020392 | 0.7373838101808140 |
